# Supplementary material
Source: PubMed Central journal article supplement (PMC3702370)
Supplement: NIHMS473618-supplement-Supporting_Information.pdf [file NIHMS473618-supplement-Supporting_Information.pdf]

# DETERMINATION OF ABSOLUTE CONFIGURATION OF SECONDARY ALCOHOLS USING THIN-LAYER CHROMATOGRAPHY

Alexander J. Wagner and Scott D. Rychnovsky\*

*Department of Chemistry, 1102 Natural Sciences II, University of California, Irvine,  
California 92697-2025*

*srychnov@uci.edu*

## SUPPORTING INFORMATION

### TABLE OF CONTENTS

|                                                                  |     |
|------------------------------------------------------------------|-----|
| Reaction Conditions for Table 1, Entries 1-13.....               | S2  |
| Summary of TLC and <sup>1</sup> H NMR Spectra, Entries 1-13..... | S3  |
| <sup>1</sup> H NMR Spectra.....                                  | S16 |
| Chiral Analytical Traces for Entries 1-3, 6-7.....               | S46 |

### Reaction Conditions for Table 1, Entries 1-13.

The table below contains reaction conditions for all samples used in Table 1. The protocol listed in the experimental for using parallel reactions in the process of determining absolute configuration was followed for all of the entries.

| Entry          | Original amount of alcohol (mg/ $\mu$ mol) | CDCl <sub>3</sub> added to alcohol vial ( $\mu$ L) | Alcohol solution added to each reaction ( $\mu$ L) | <i>R</i> -HBTM solution added to <i>R</i> -HBTM reaction ( $\mu$ L) | <i>S</i> -HBTM solution added to <i>S</i> -HBTM reaction ( $\mu$ L) | <i>i</i> Pr <sub>2</sub> NEt solution added to each reaction ( $\mu$ L) | (EtCO) <sub>2</sub> O solution added to each reaction ( $\mu$ L) | Methanol-d <sub>4</sub> added to quench each reaction ( $\mu$ L) | CDCl <sub>3</sub> added to give 500 $\mu$ L total volume for each reaction ( $\mu$ L) |
|----------------|--------------------------------------------|----------------------------------------------------|----------------------------------------------------|---------------------------------------------------------------------|---------------------------------------------------------------------|-------------------------------------------------------------------------|------------------------------------------------------------------|------------------------------------------------------------------|---------------------------------------------------------------------------------------|
| 1              | 9.1/74                                     | 403.8                                              | 175.0                                              | 131.6                                                               | 131.6                                                               | 72.5                                                                    | 67.0                                                             | 50.0                                                             | 4.0                                                                                   |
| 2 <sup>a</sup> | 10.4/60.9                                  | 403.8                                              | 175.0                                              | 108.3                                                               | 108.3                                                               | 59.7                                                                    | 55.1                                                             | 50.0                                                             | 51.9                                                                                  |
| 3 <sup>a</sup> | 9.7/58                                     | 403.8                                              | 175.0                                              | 103.1                                                               | 103.1                                                               | 56.9                                                                    | 52.5                                                             | 50.0                                                             | 62.6                                                                                  |
| 4              | 8.9/48                                     | 300.0                                              | 130.0                                              | 85.2                                                                | 85.2                                                                | 47.2                                                                    | 43.4                                                             | 50.0                                                             | 144.2                                                                                 |
| 5              | 5.1/19                                     | 150.0                                              | 65.0                                               | 33.8                                                                | 33.8                                                                | 18.6                                                                    | 17.2                                                             | 50.0                                                             | 315.4                                                                                 |
| 6              | 8.7/40                                     | 276.9                                              | 120.0                                              | 71.2                                                                | 71.2                                                                | 39.2                                                                    | 36.2                                                             | 50.0                                                             | 183.5                                                                                 |
| 7              | 6.3/25                                     | 184.6                                              | 80.0                                               | 44.4                                                                | 44.4                                                                | 24.6                                                                    | 22.6                                                             | 50.0                                                             | 278.4                                                                                 |
| 8              | 5.7/18                                     | 150.0                                              | 65.0                                               | 32.0                                                                | 32.0                                                                | 17.8                                                                    | 16.2                                                             | 50.0                                                             | 319.0                                                                                 |
| 9              | 5.6/17                                     | 150.0                                              | 65.0                                               | 30.2                                                                | 30.2                                                                | 16.8                                                                    | 15.4                                                             | 50.0                                                             | 322.7                                                                                 |
| 10             | 7.3/32                                     | 196.2                                              | 85.0                                               | 56.8                                                                | 56.8                                                                | 31.4                                                                    | 28.8                                                             | 50.0                                                             | 247.8                                                                                 |
| 11             | 6.6/18                                     | 150.0                                              | 65.0                                               | 32.0                                                                | 32.0                                                                | 17.6                                                                    | 16.2                                                             | 50.0                                                             | 319.1                                                                                 |
| 12             | 6.2/18                                     | 150.0                                              | 65.0                                               | 32.0                                                                | 32.0                                                                | 17.6                                                                    | 16.2                                                             | 50.0                                                             | 319.1                                                                                 |
| 13             | 5.8/20                                     | 150.0                                              | 65.0                                               | 35.6                                                                | 35.6                                                                | 19.6                                                                    | 18.0                                                             | 50.0                                                             | 311.7                                                                                 |

(a) The peak from methanol-d<sub>4</sub> overlaid a peak from the alcohol used in determining conversion in the crude <sup>1</sup>H NMR spectrum. The solution was concentrated under reduced pressure. Then, 500  $\mu$ L of CDCl<sub>3</sub> was added and a second <sup>1</sup>H NMR spectrum was taken. Both spectra are included.

<sup>1</sup>H NMR spectra were collected for both the *R*-HBTM and the *S*-HBTM crude reaction mixtures. Percent conversion for each reaction was measured according the integrals of each peak after phase correction, line broadening, and automatic baseline correction of all spectra (Formula 1).

#### Formula 1.

$$\text{Percent Conversion} = \frac{{}^1\text{H NMR integral}_{\text{ESTER}}}{{}^1\text{H NMR integral}_{\text{ESTER}} + {}^1\text{H NMR integral}_{\text{ALCOHOL}}} \times 100$$

**Summary of TLC and  $^1\text{H}$  NMR Spectral Data, Entries 1-13.**

**Entry 1. (a) TLC of parallel reactions (b)  $^1\text{H}$  NMR Spectra of parallel reactions in  $\text{CDCl}_3$  at 500 MHz.**

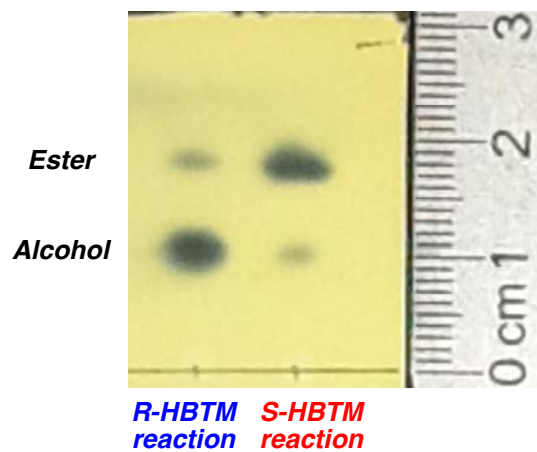**(a)**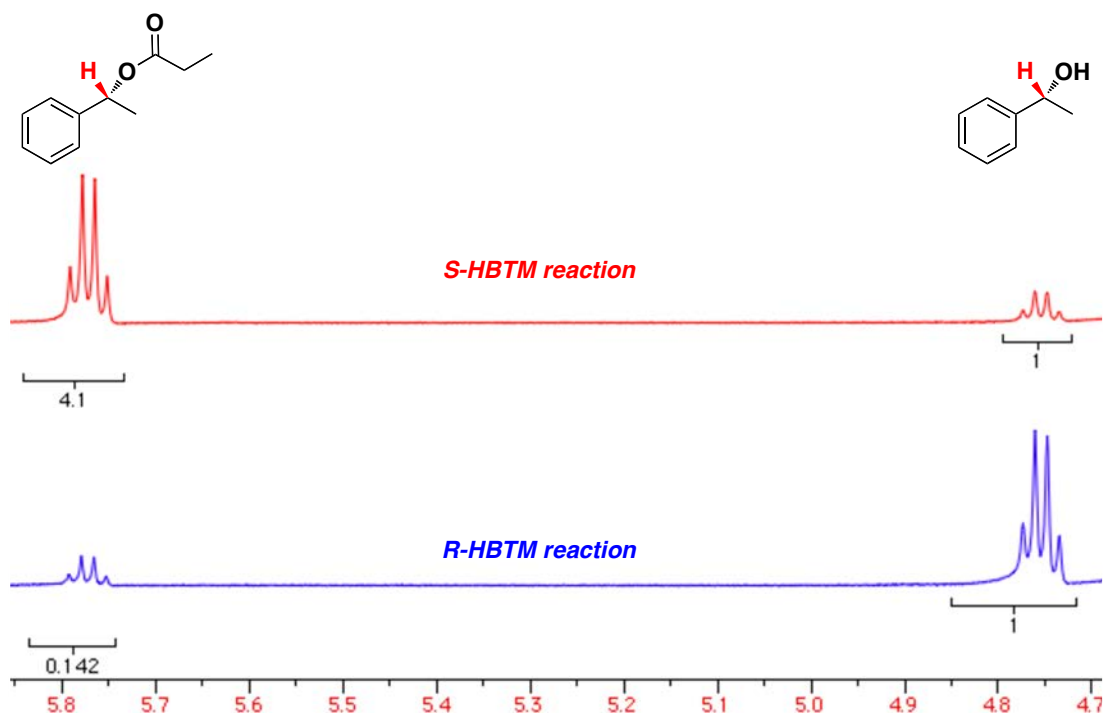**(b)**

Entry 2. (a) TLC of parallel reactions (b)  $^1\text{H}$  NMR Spectra of parallel reactions in  $\text{CDCl}_3$  at 500 MHz.

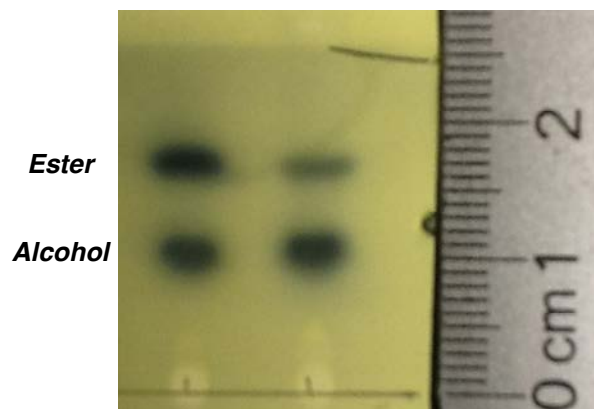

**R-HBTM reaction** **S-HBTM reaction**

(a)

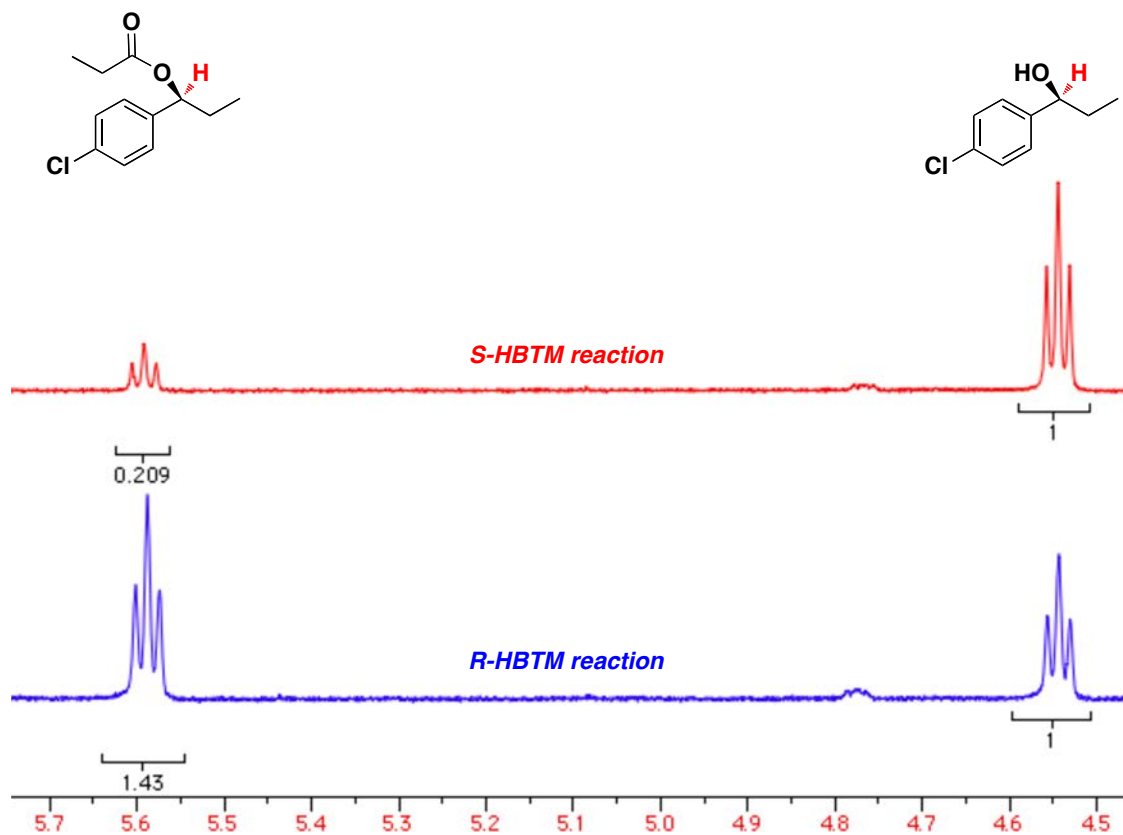

(b)

Entry 3. (a) TLC of parallel reactions (b)  $^1\text{H}$  NMR Spectra of parallel reactions in  $\text{CDCl}_3$  at 500 MHz.

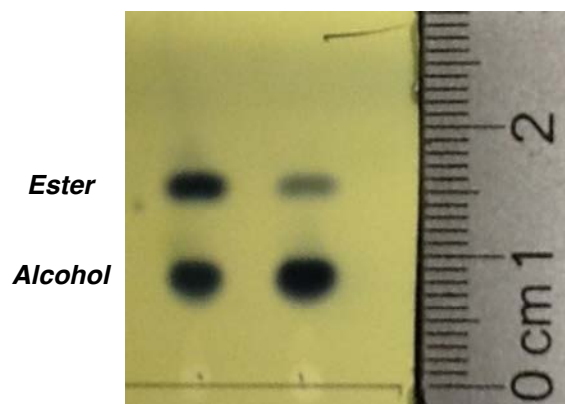

**R-HBTM** **S-HBTM**  
**reaction** **reaction**

(a)

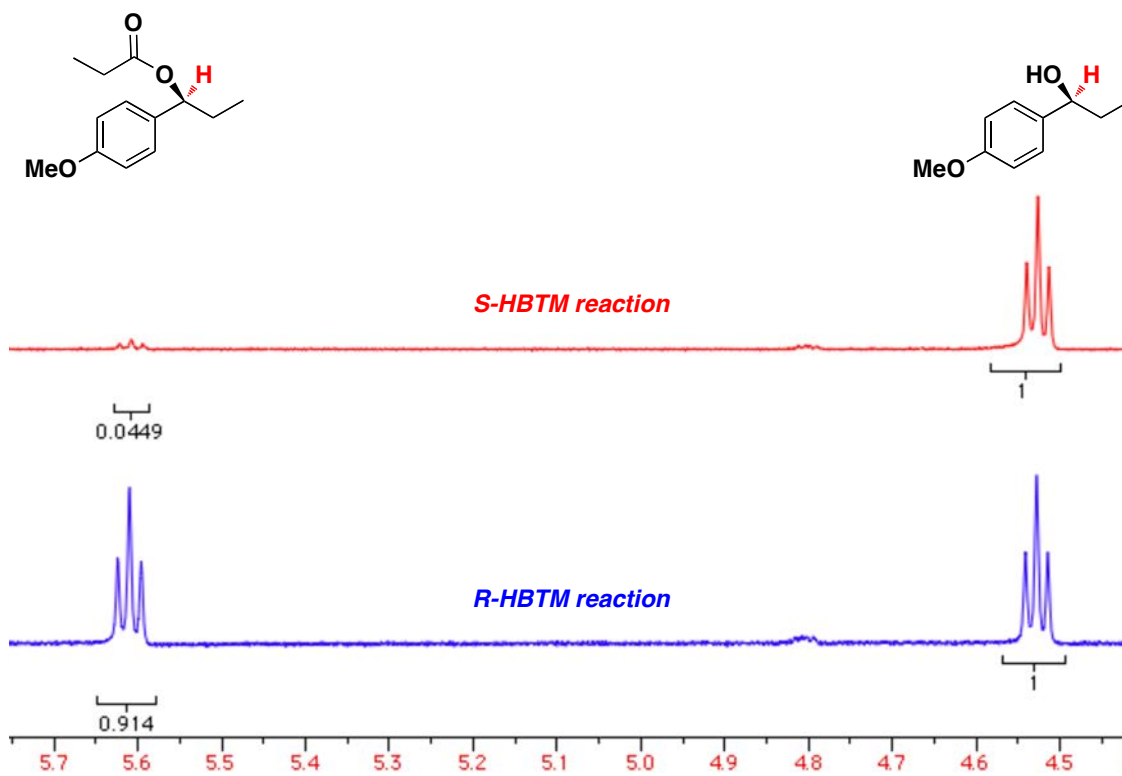

(b)

Entry 4. (a) TLC of parallel reactions (b)  $^1\text{H}$  NMR Spectra of parallel reactions in  $\text{CDCl}_3$  at 500 MHz.

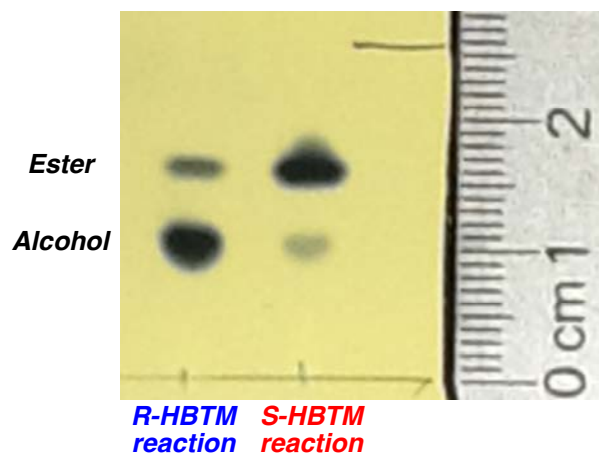

(a)

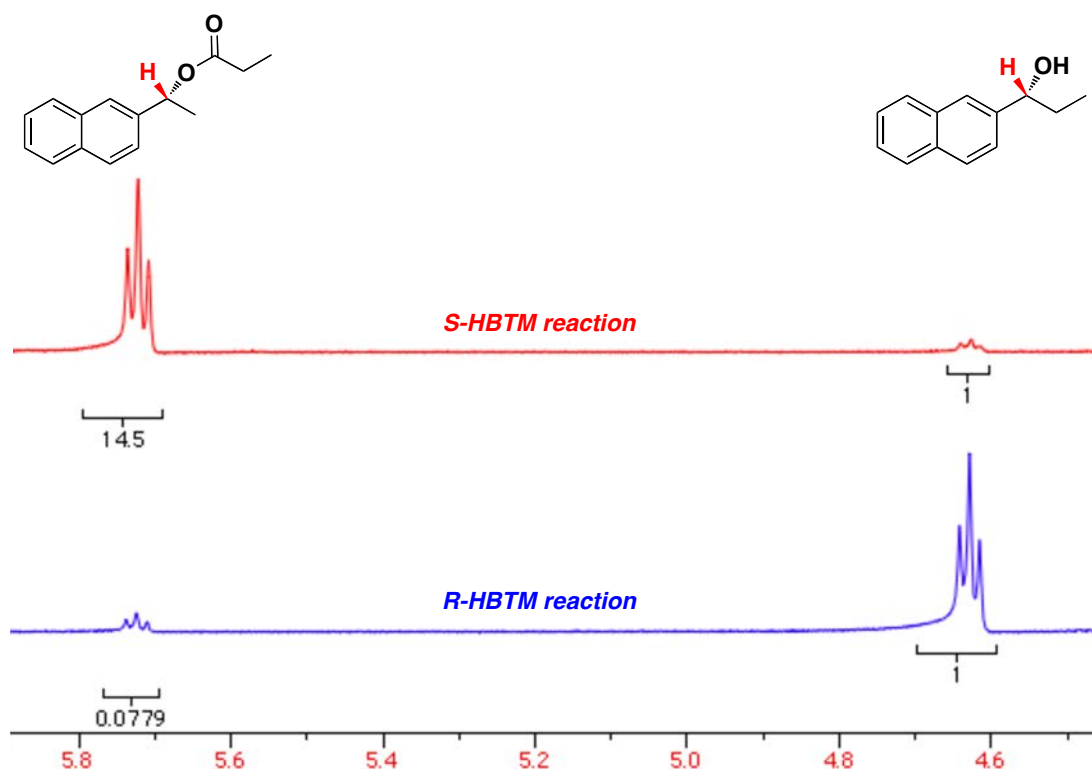

(b)

Entry 5. (a) TLC of parallel reactions (b)  $^1\text{H}$  NMR Spectra of parallel reactions in  $\text{CDCl}_3$  at 500 MHz.

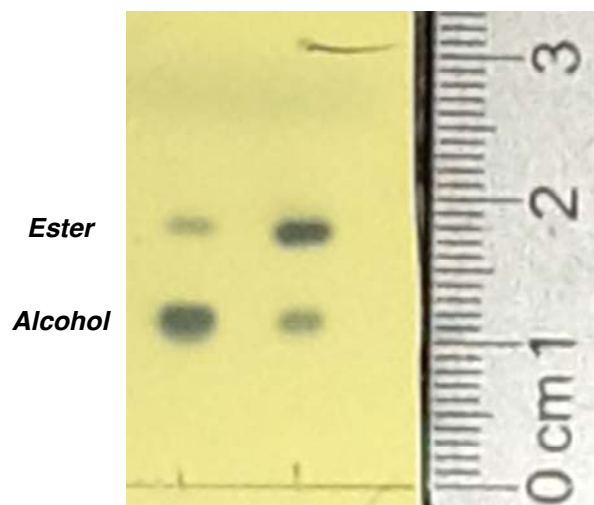

**R-HBTM reaction**

**S-HBTM reaction**

(a)

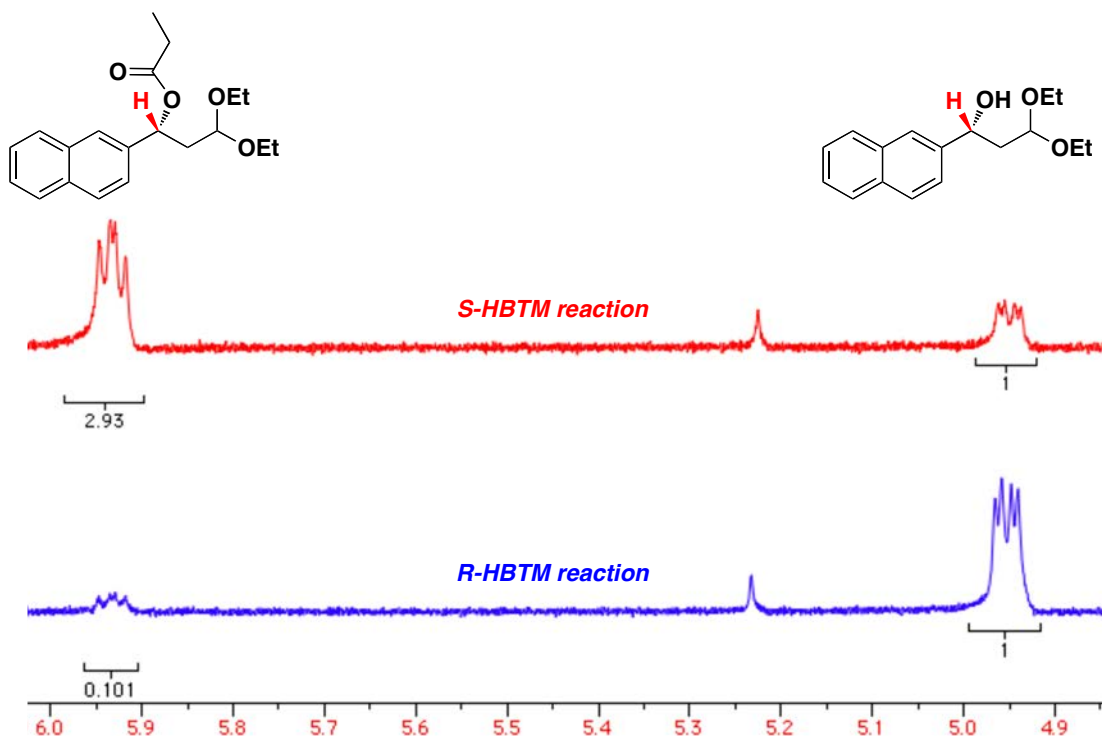

(b)

Entry 6. (a) TLC of parallel reactions (b)  $^1\text{H}$  NMR Spectra of parallel reactions in  $\text{CDCl}_3$  at 500 MHz.

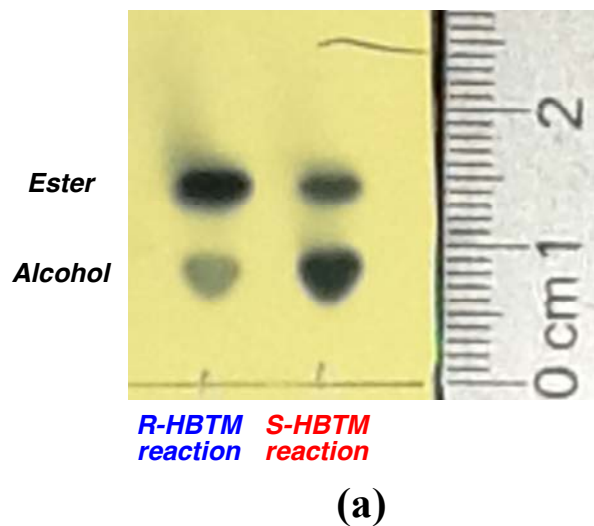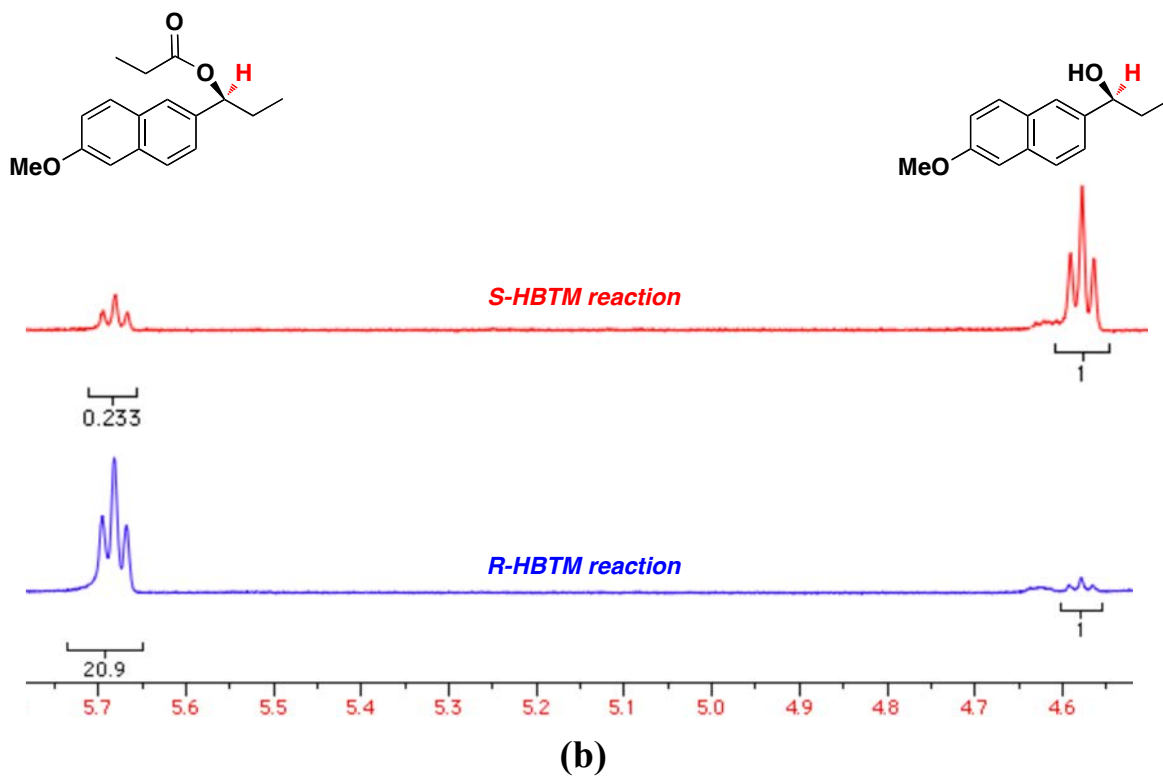



Entry 7. (a) TLC of parallel reactions (b)  $^1\text{H}$  NMR Spectra of parallel reactions in  $\text{CDCl}_3$  at 500 MHz.

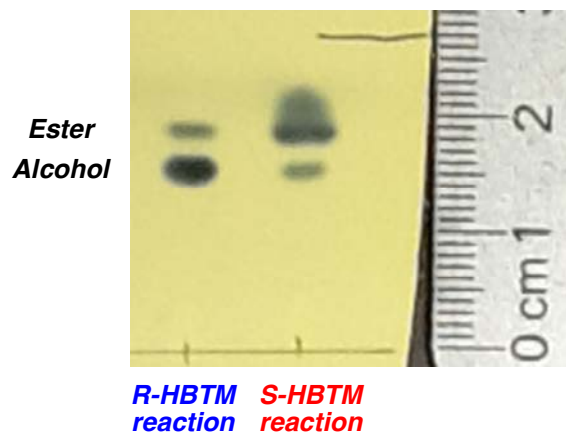

(a)

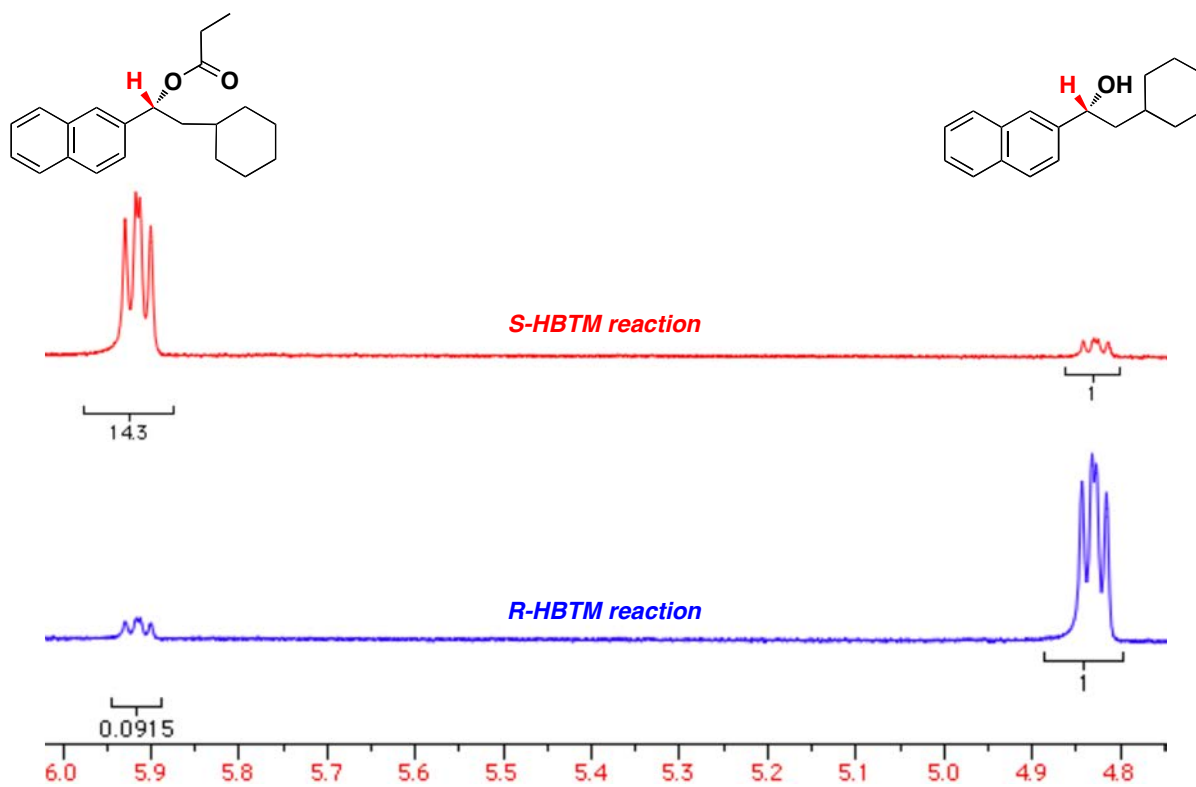

(b)

Entry 8. (a) TLC of parallel reactions (b)  $^1\text{H}$  NMR Spectra of parallel reactions in  $\text{CDCl}_3$  at 500 MHz.

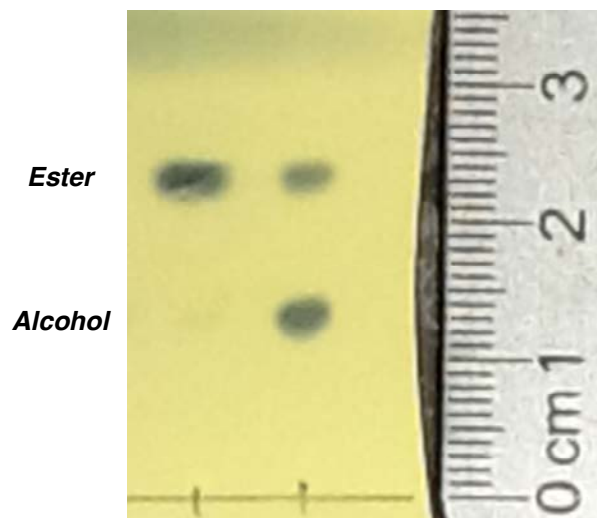

*R*-HBTM reaction    *S*-HBTM reaction

(a)

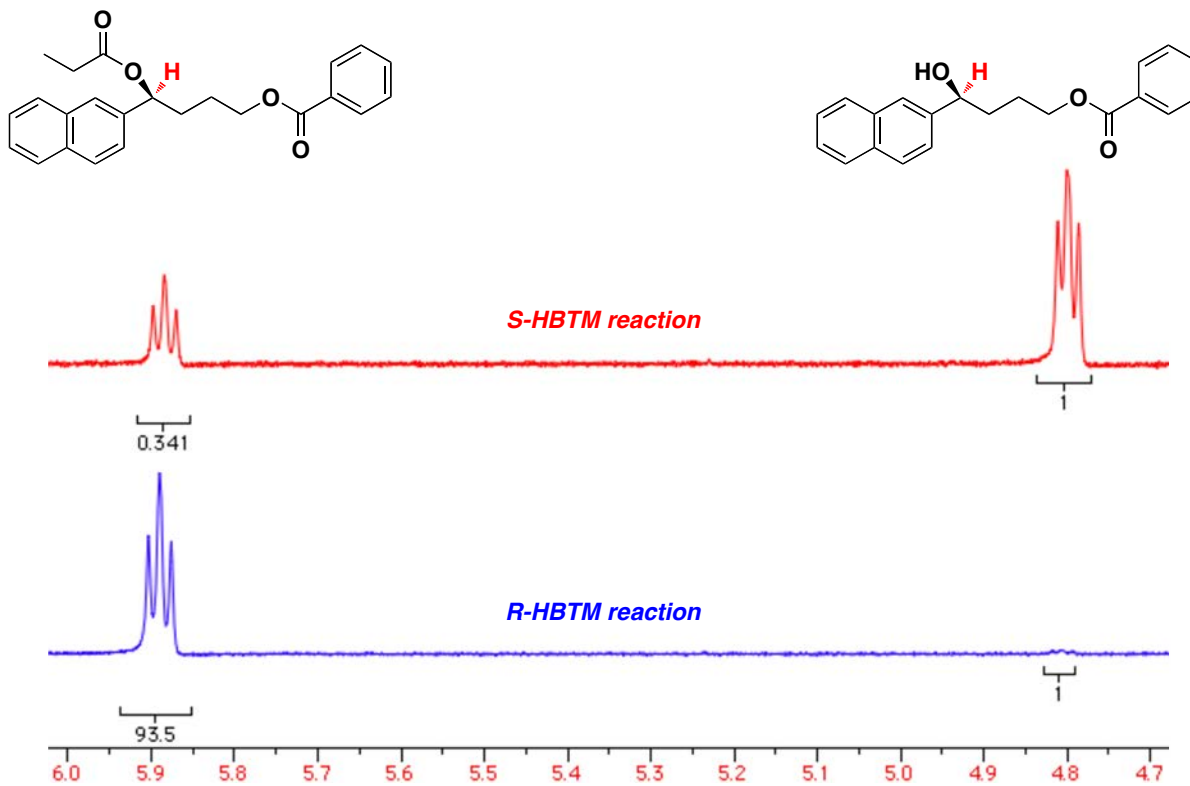

(b)

Entry 9. (a) TLC of parallel reactions (b)  $^1\text{H}$  NMR Spectra of parallel reactions in  $\text{CDCl}_3$  at 500 MHz.

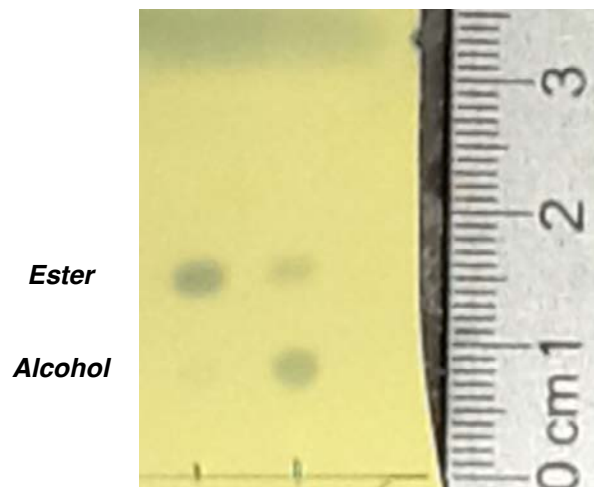

*R*-HBTM reaction  
*S*-HBTM reaction

(a)

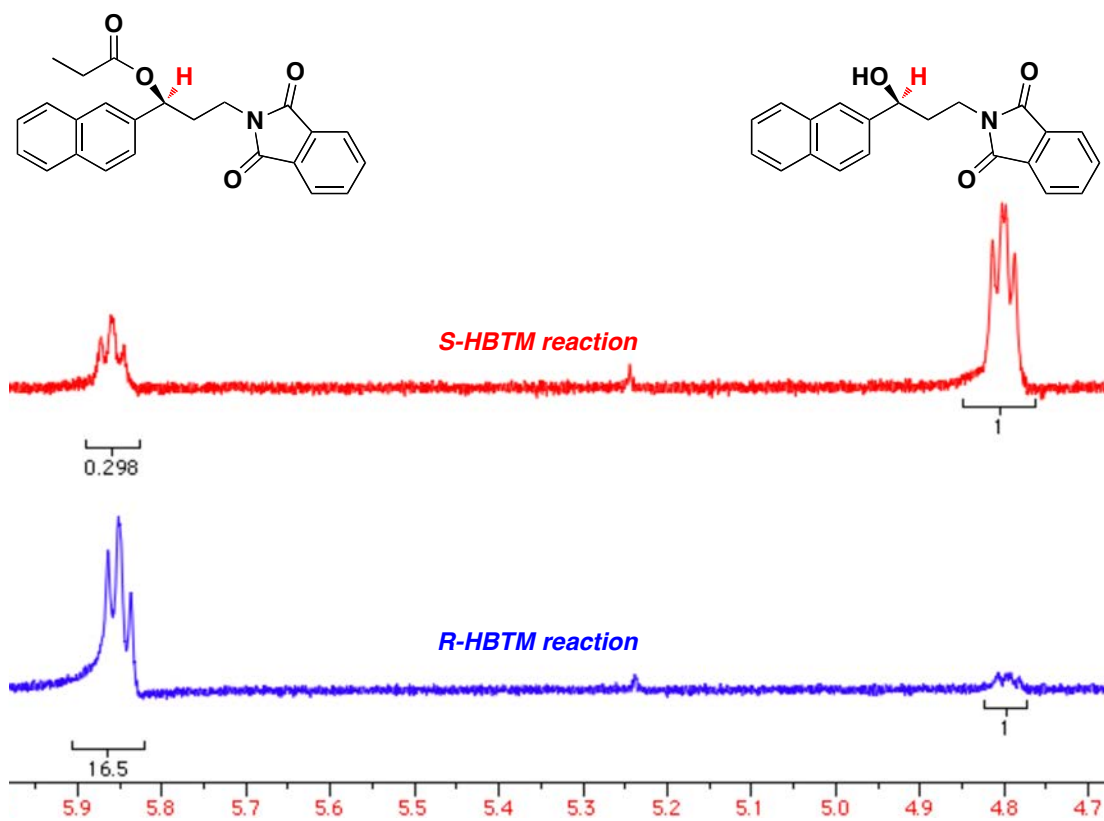

(b)

Entry 10. (a) TLC of parallel reactions (b)  $^1\text{H}$  NMR Spectra of parallel reactions in  $\text{CDCl}_3$  at 500 MHz.

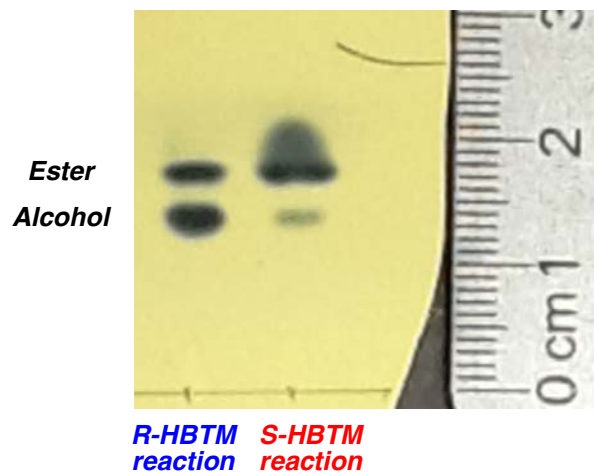

(a)

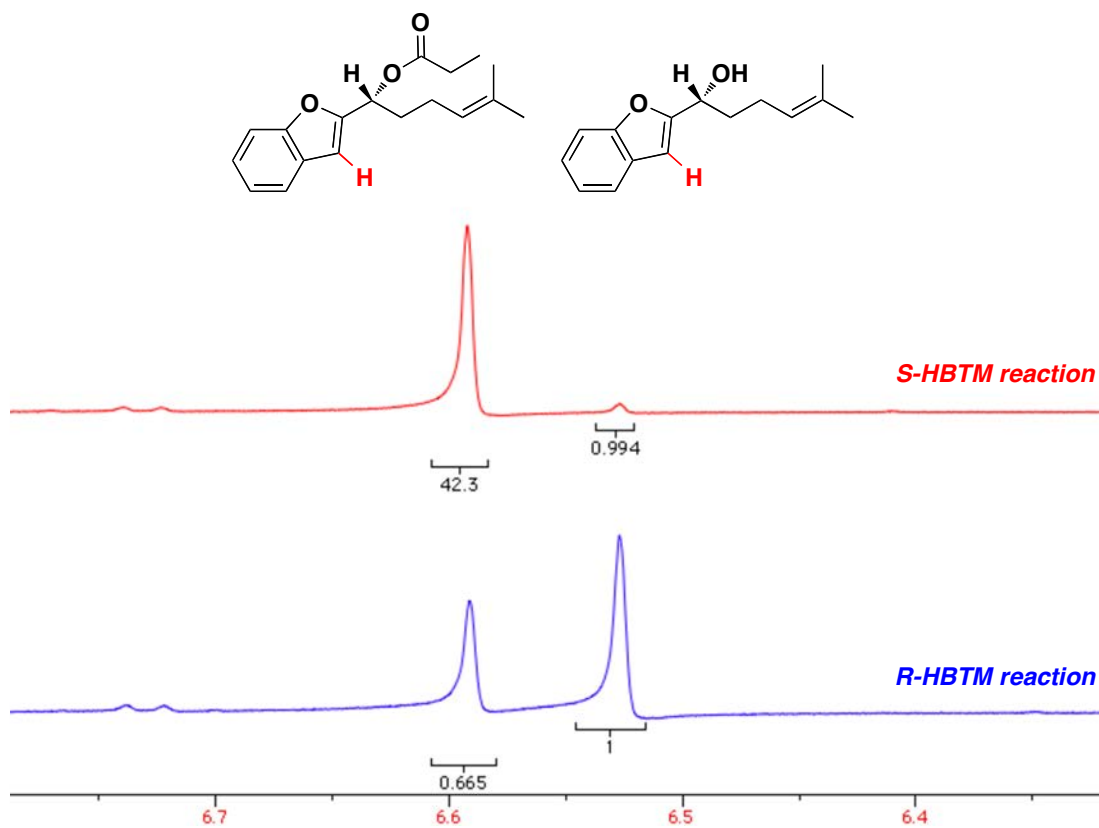

(b)

Entry 11. (a) TLC of parallel reactions (b)  $^1\text{H}$  NMR Spectra of parallel reactions in  $\text{CDCl}_3$  at 500 MHz.

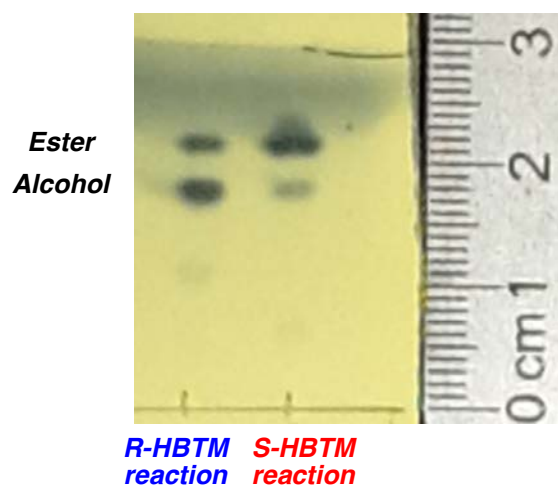

(a)

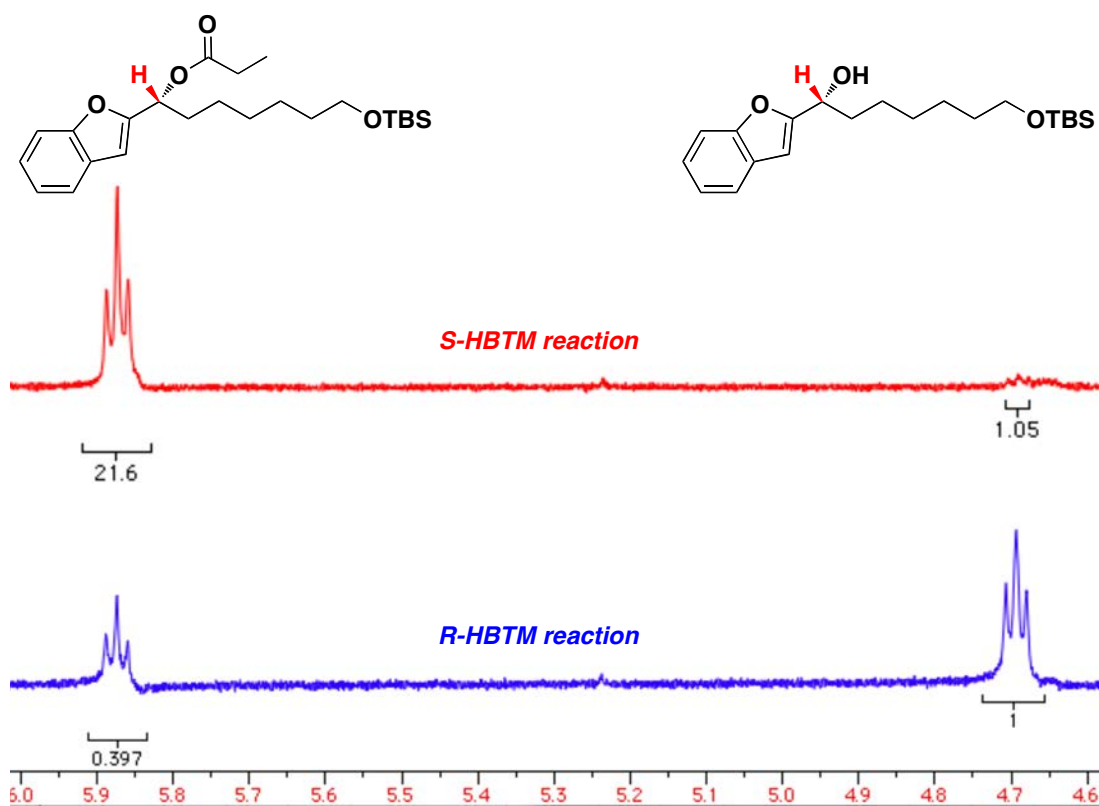

(b)

Entry 12. (a) TLC of parallel reactions (b)  $^1\text{H}$  NMR Spectra of parallel reactions in  $\text{CDCl}_3$  at 500 MHz.

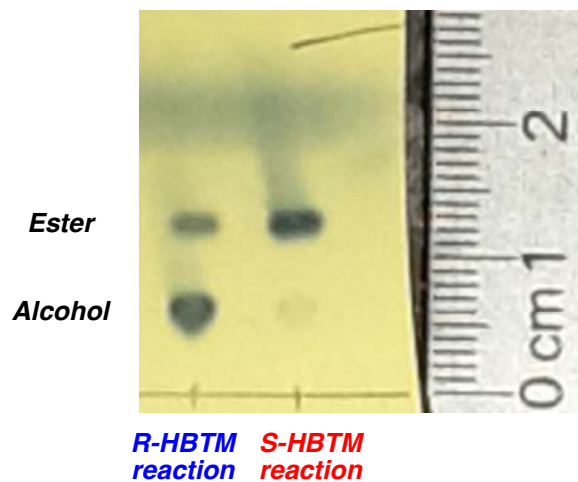

(a)

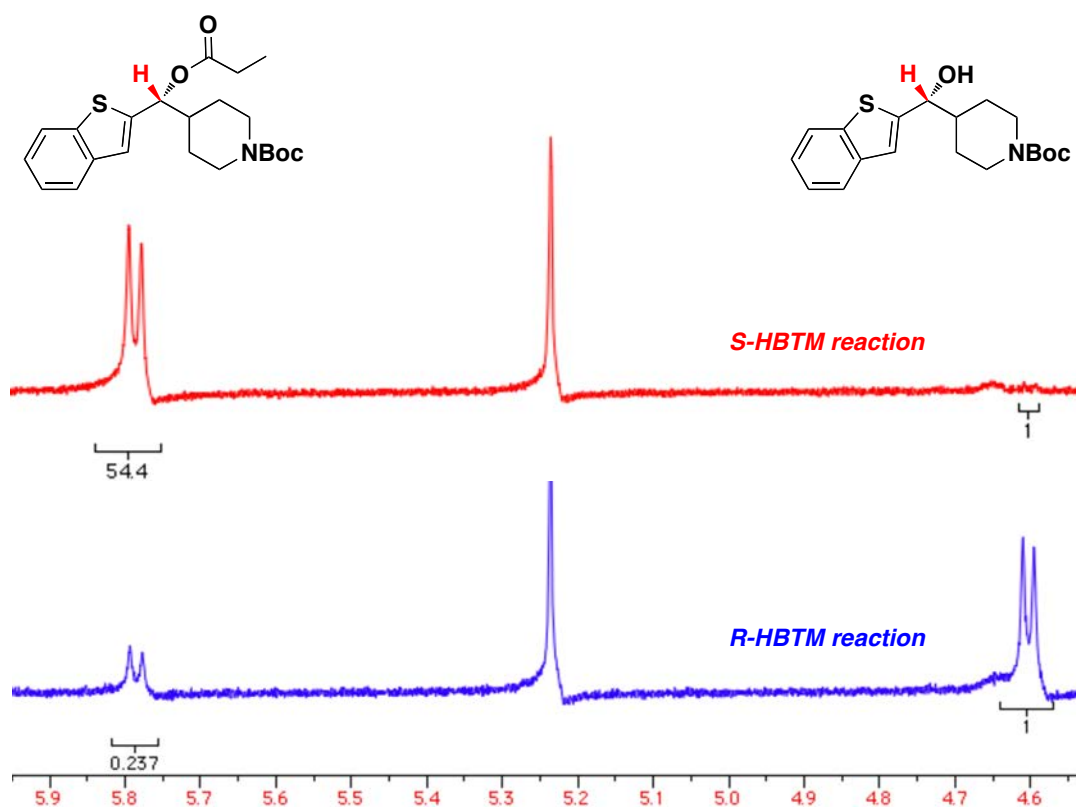

(b)

Entry 13. (a) TLC of parallel reactions (b)  $^1\text{H}$  NMR Spectra of parallel reactions in  $\text{CDCl}_3$  at 500 MHz.

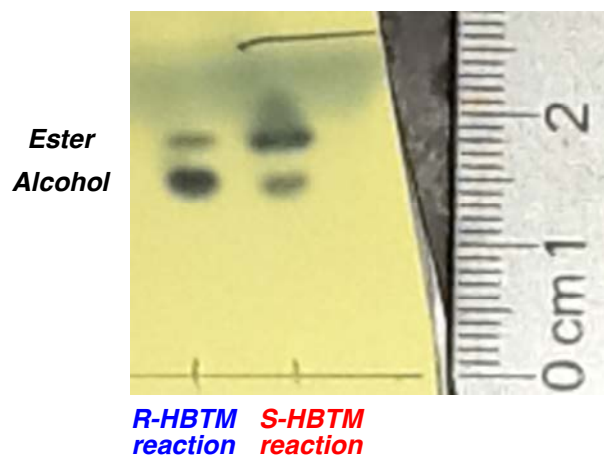

(a)

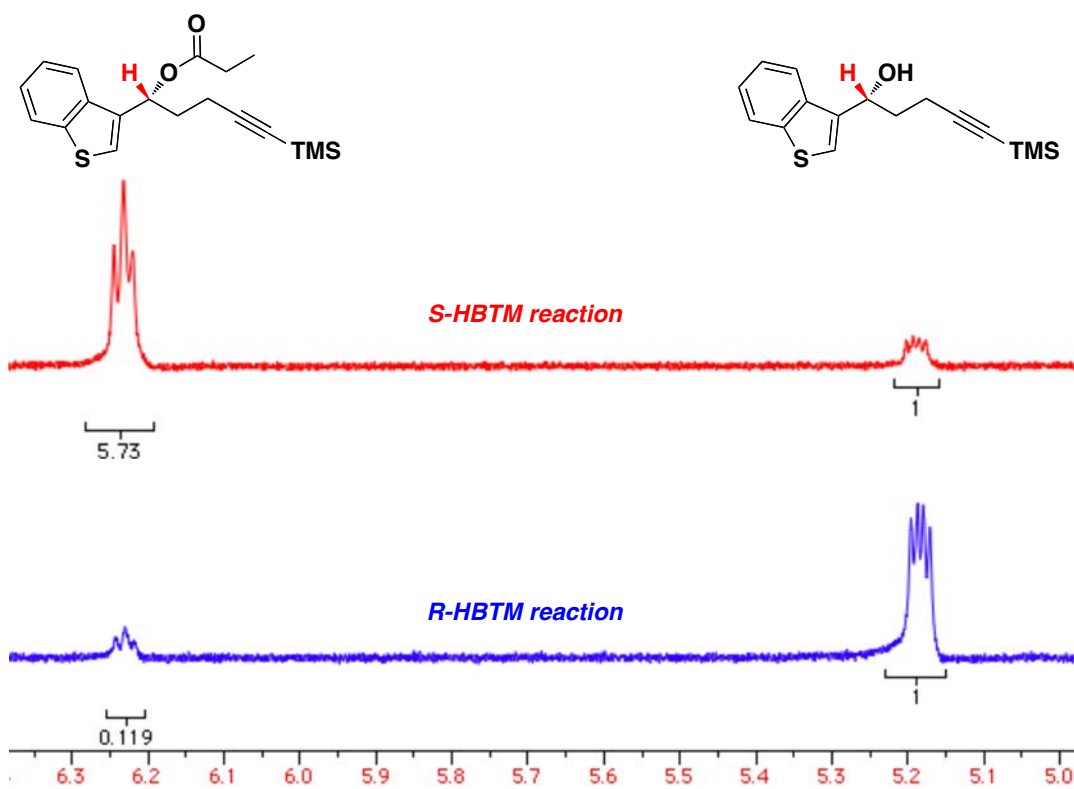

(b)

$^1\text{H}$  NMR in  $\text{CDCl}_3$  at 500 MHz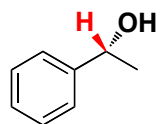

Entry 1 with R-HBTM

7.260

5.793  
5.779  
5.766  
5.7534.774  
4.761  
4.748  
4.735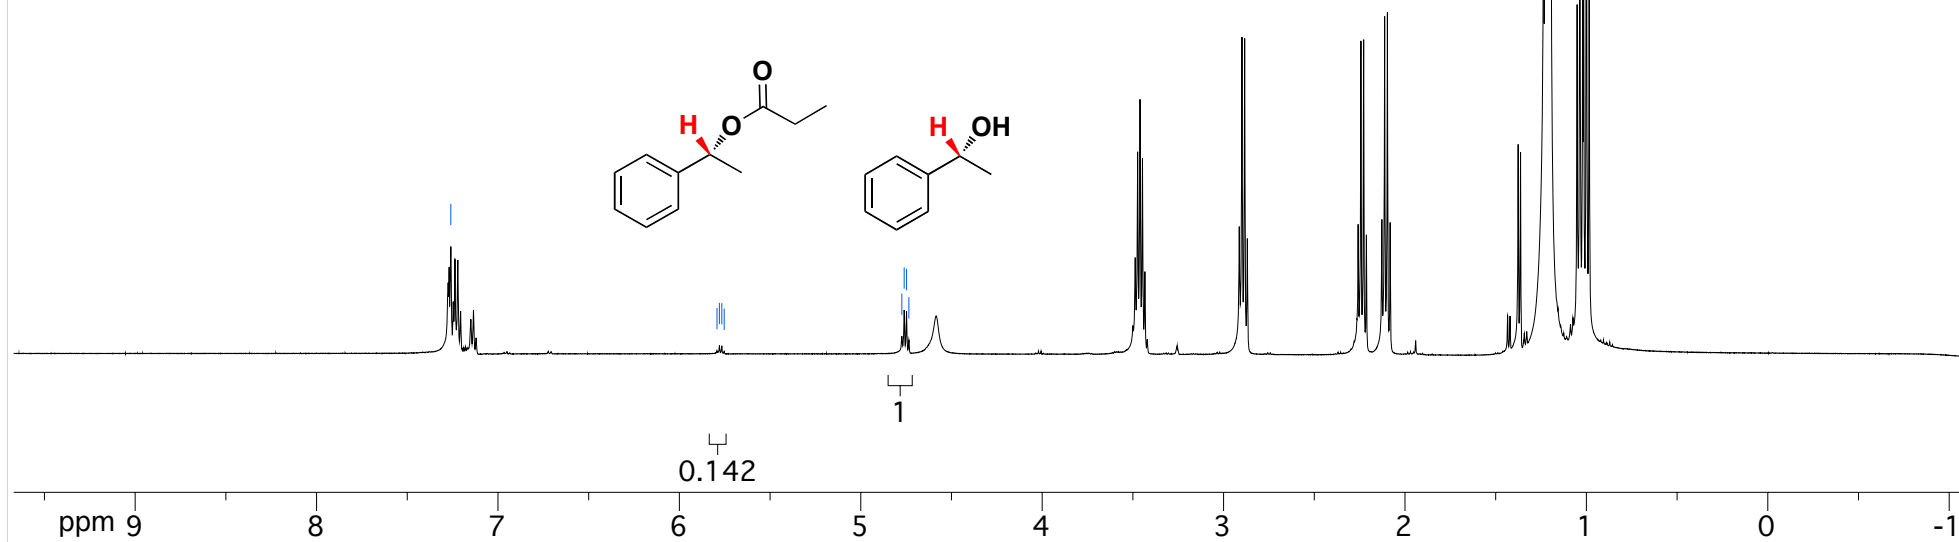



$^1\text{H}$  NMR in  $\text{CDCl}_3$  at 500 MHz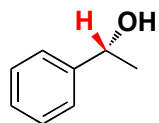

Entry 1 with S-HBTM

7.260

5.784  
5.770  
5.757  
5.7444.766  
4.753  
4.740  
4.727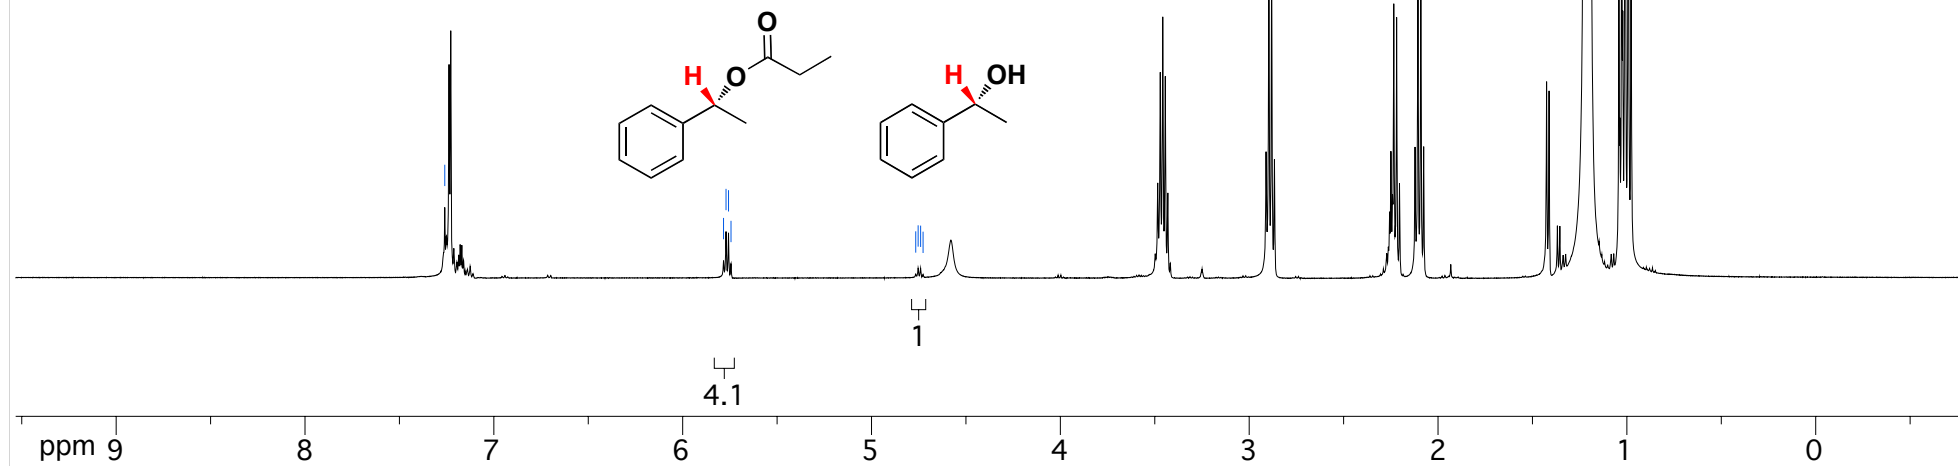

$^1\text{H}$  NMR in  $\text{CDCl}_3$  at 500 MHz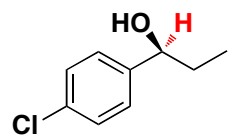

Entry 2 with R-HBTM

7.260

5.601  
5.588  
5.5744.557  
4.543  
4.530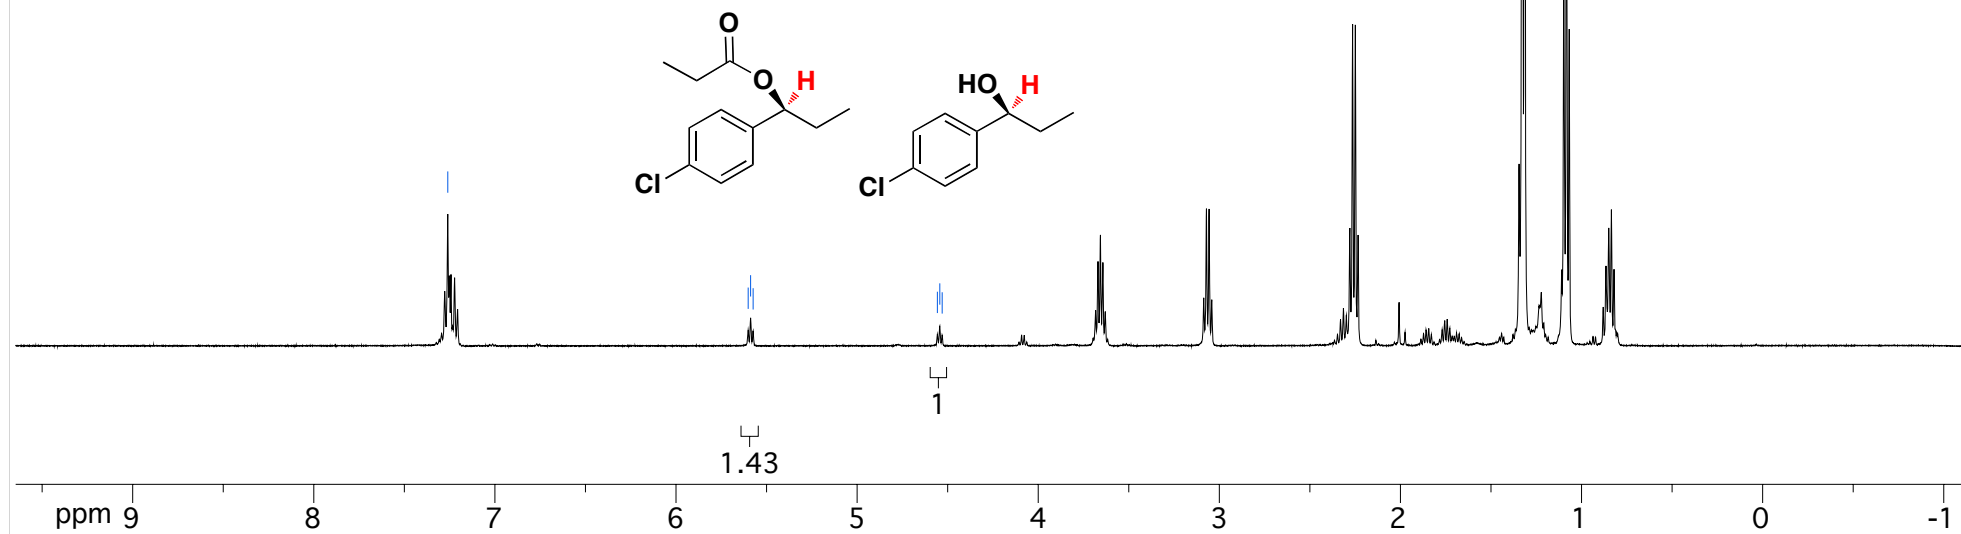

Wagner and Rychnovsky

 $^1\text{H}$  NMR in  $\text{CDCl}_3$  at 500 MHz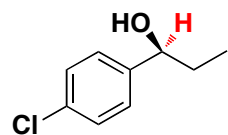

Entry 2 with R-HBTM

7.260

5.601  
5.588  
5.5744.557  
4.543  
4.530

Crude NMR before concentration to remove methanol

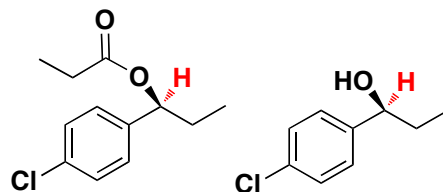Crude NMR after concentration and adding 0.500 mL  $\text{CDCl}_3$ 

1.43

1

ppm 9 8 7 6 5 4 3 2 1 0 -1

$^1\text{H}$  NMR in  $\text{CDCl}_3$  at 500 MHz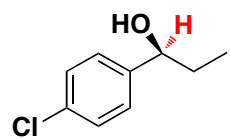

Entry 2 with S-HBTM

7.260

5.602  
5.588  
5.5734.556  
4.543  
4.529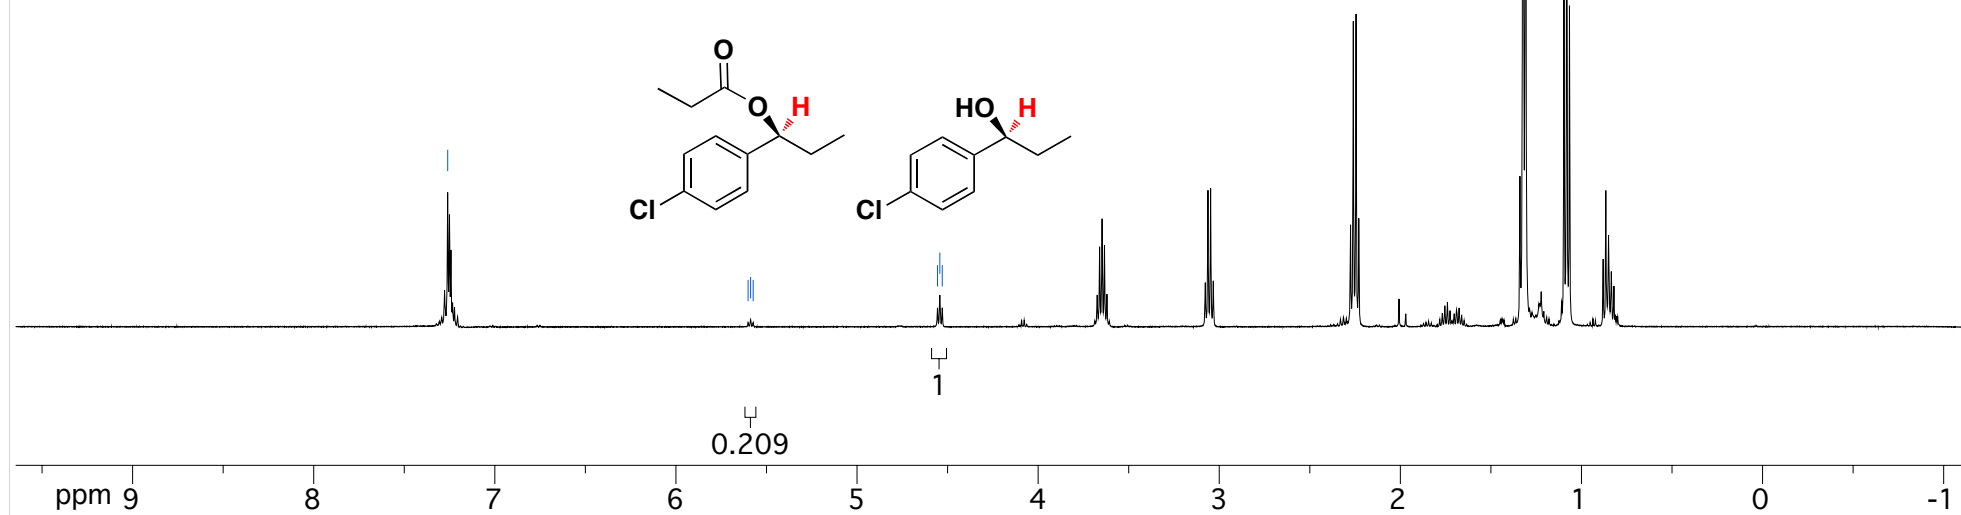

Wagner and Rychnovsky

 $^1\text{H}$  NMR in  $\text{CDCl}_3$  at 500 MHz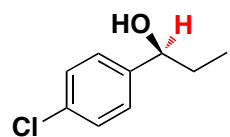

Entry 2 with S-HBTM

7.260

5.602  
5.588  
5.5734.556  
4.543  
4.529

Crude NMR before concentration to remove methanol

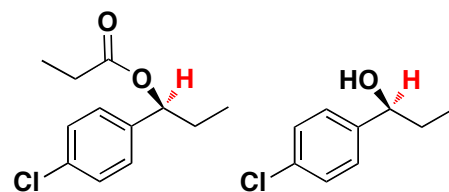Crude NMR after concentration and adding 0.500 mL  $\text{CDCl}_3$ 

0.209

1

ppm 9 8 7 6 5 4 3 2 1 0 -1

$^1\text{H}$  NMR in  $\text{CDCl}_3$  at 500 MHz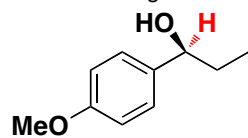

Entry 3 with R-HBTM

7.260

5.624  
5.610  
5.5964.541  
4.528  
4.514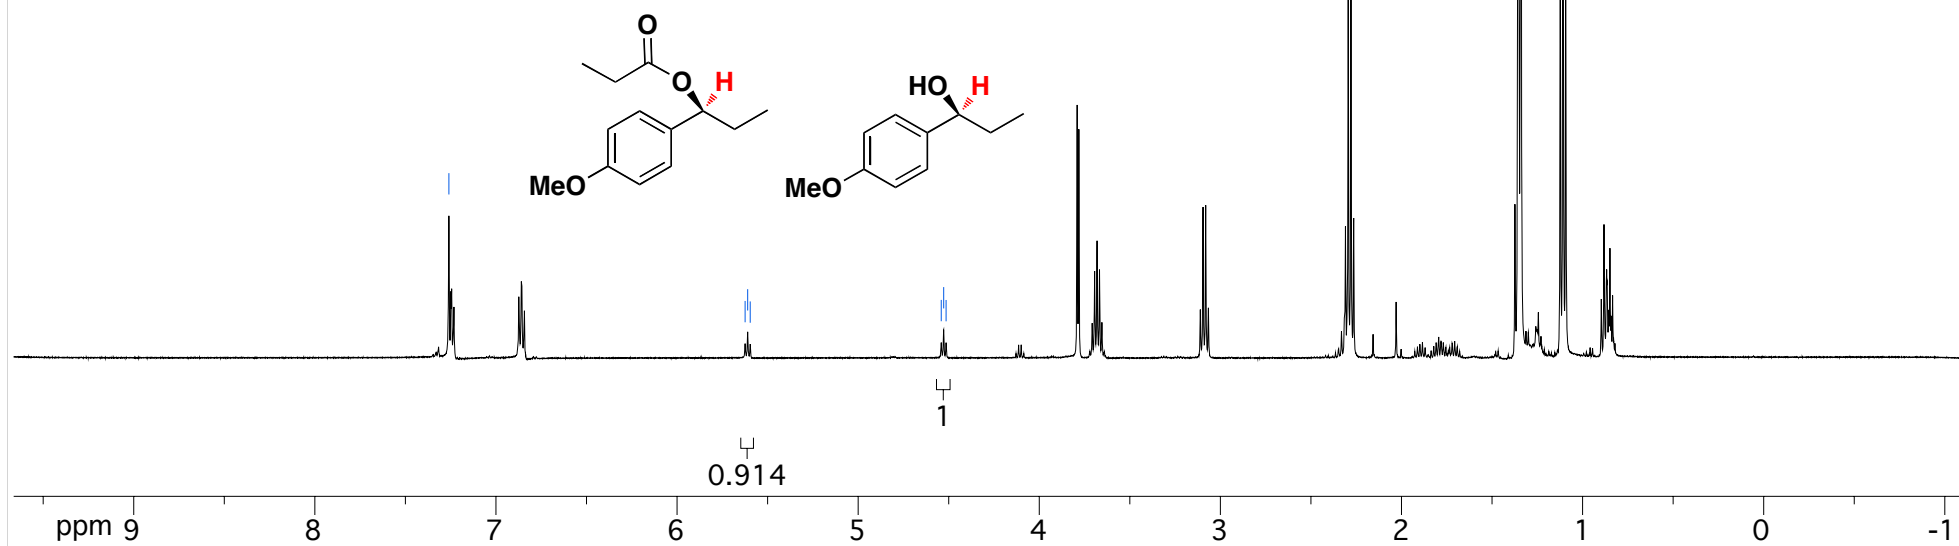

Wagner and Rychnovsky

 $^1\text{H}$  NMR in  $\text{CDCl}_3$  at 500 MHz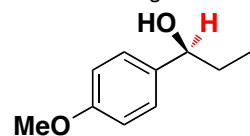

Entry 3 with R-HBTM

7.260

5.624  
5.610  
5.5964.541  
4.528  
4.514

Crude NMR before concentration to remove methanol

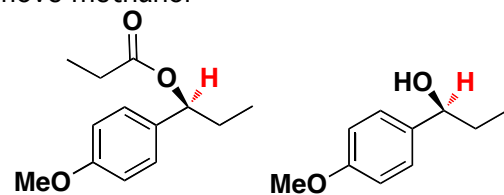Crude NMR after concentration and adding 0.500 mL  $\text{CDCl}_3$ 

0.914

1

ppm 9 8 7 6 5 4 3 2 1 0 -1

$^1\text{H}$  NMR in  $\text{CDCl}_3$  at 500 MHz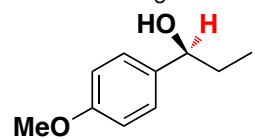

Entry 3 with S-HBTM

7.260

5.617  
5.604  
5.5904.532  
4.519  
4.505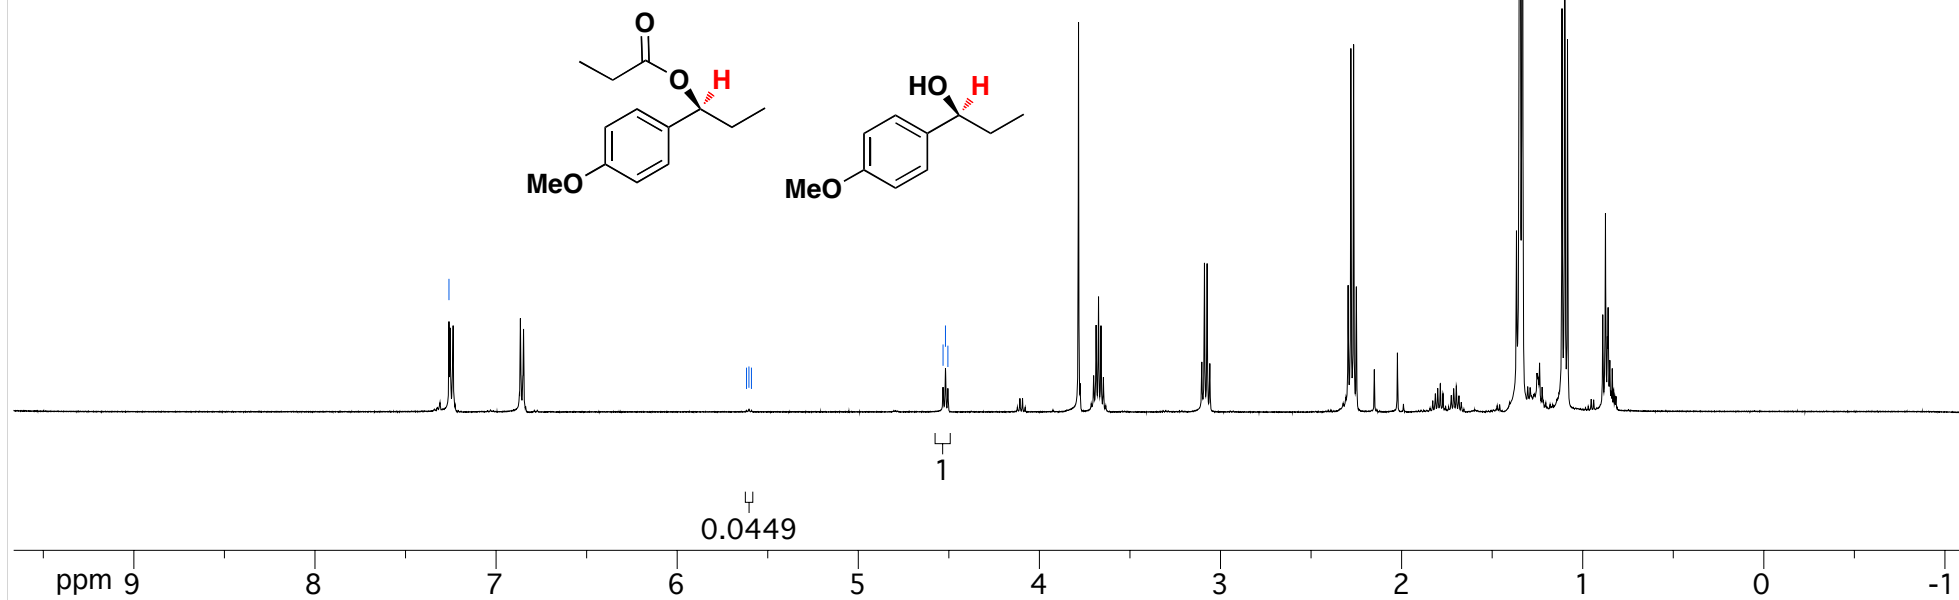



Wagner and Rychnovsky

 $^1\text{H}$  NMR in  $\text{CDCl}_3$  at 500 MHz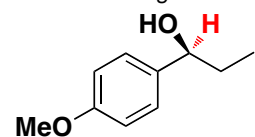

Entry 3 with S-HBTM

7.260

5.617  
5.604  
5.5904.532  
4.519  
4.505

Crude NMR before concentration to remove methanol

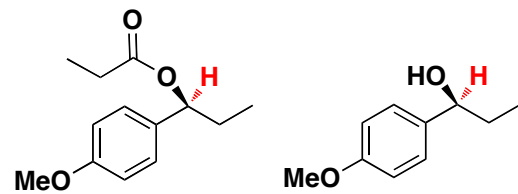Crude NMR after concentration and adding 0.500 mL  $\text{CDCl}_3$ 

0.0449

1

ppm 9 8 7 6 5 4 3 2 1 0 -1

Wagner and Rychnovsky

 $^1\text{H}$  NMR in  $\text{CDCl}_3$  at 500 MHz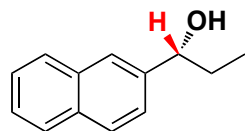

Entry 4 with R-HBTM

7.260

5.738  
5.724  
5.7104.642  
4.628  
4.615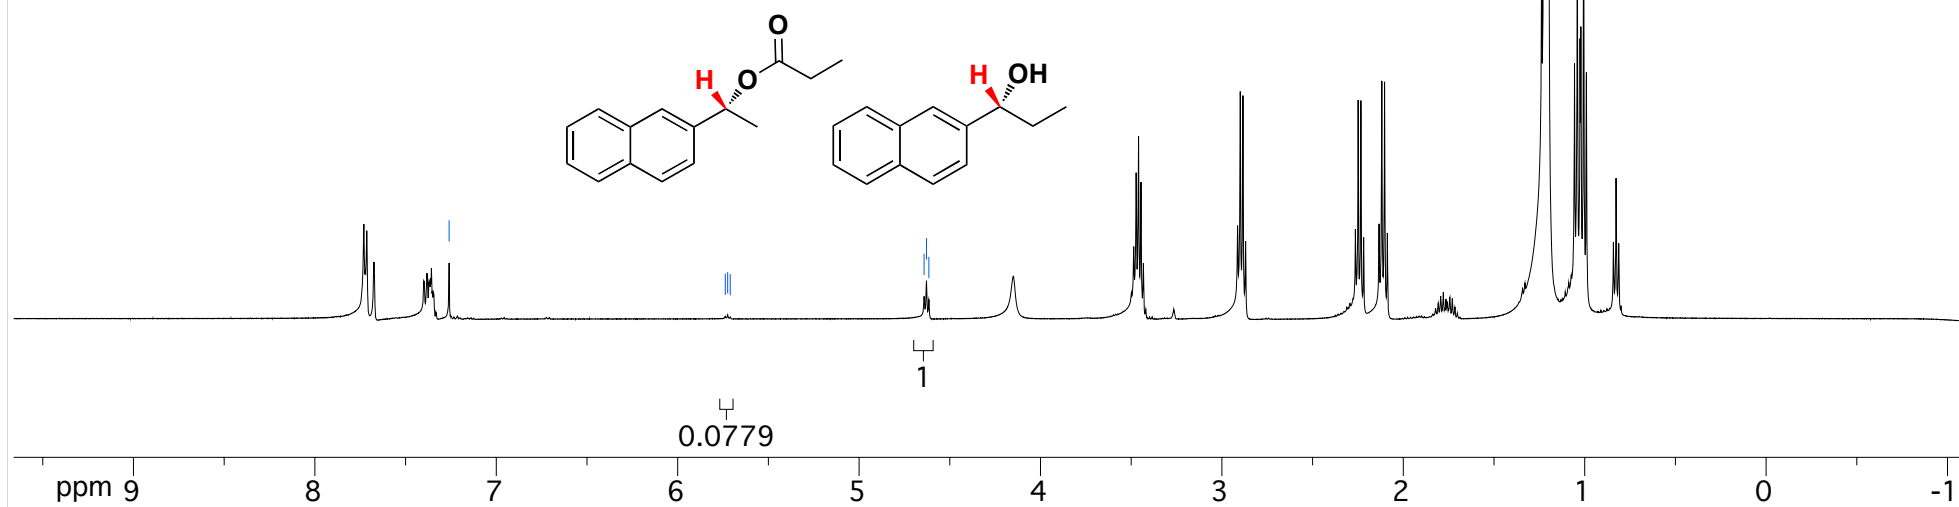

$^1\text{H}$  NMR in  $\text{CDCl}_3$  at 500 MHz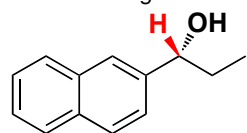

Entry 4 with S-HBTM

7.260

5.739  
5.725  
5.7114.644  
4.631  
4.619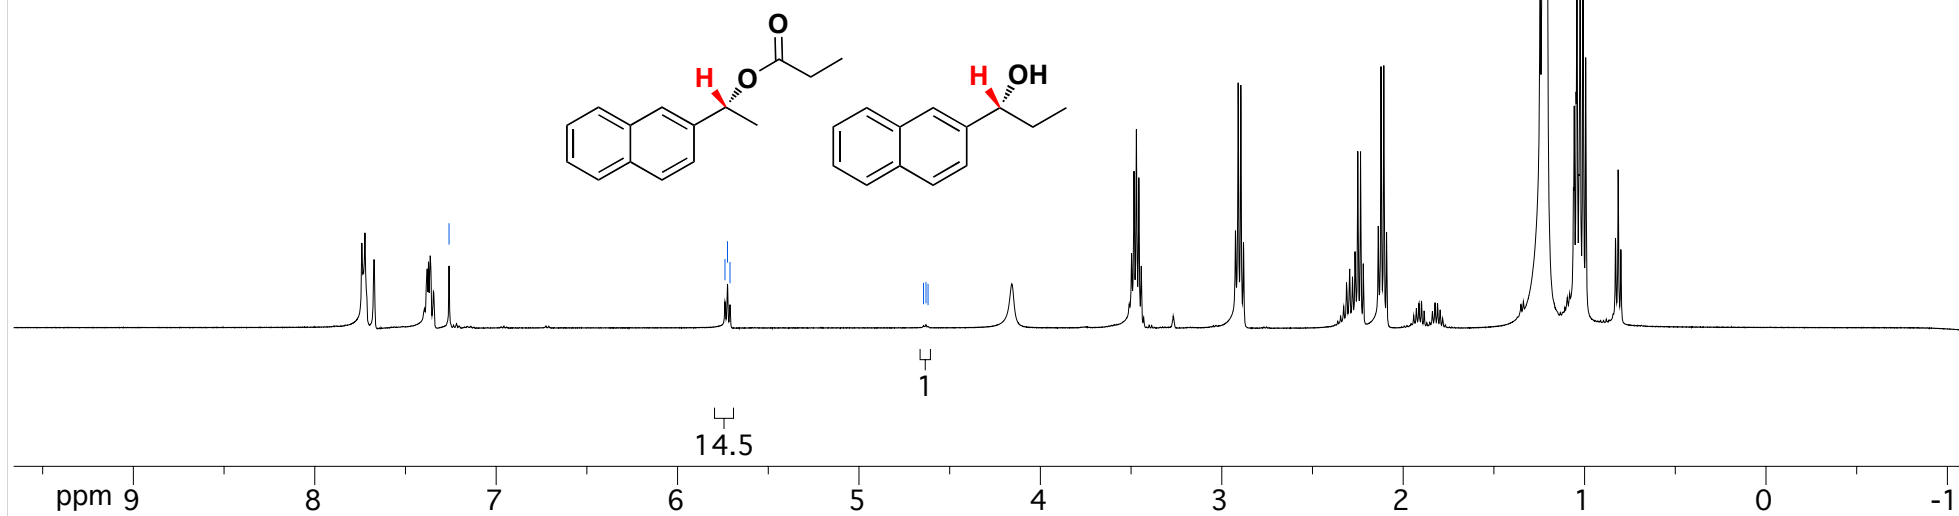

Wagner and Rychnovsky

 $^1\text{H}$  NMR in  $\text{CDCl}_3$  at 500 MHz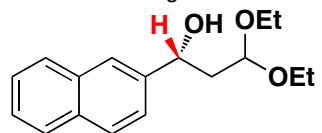

Entry 5 with R-HBTM

7.260

5.947  
5.935  
5.930  
5.9184.966  
4.958  
4.948  
4.940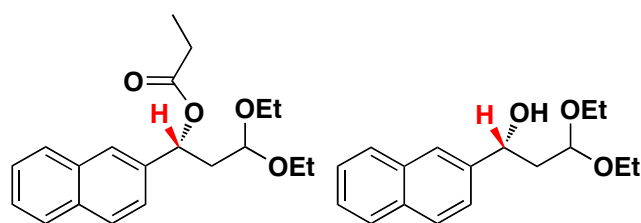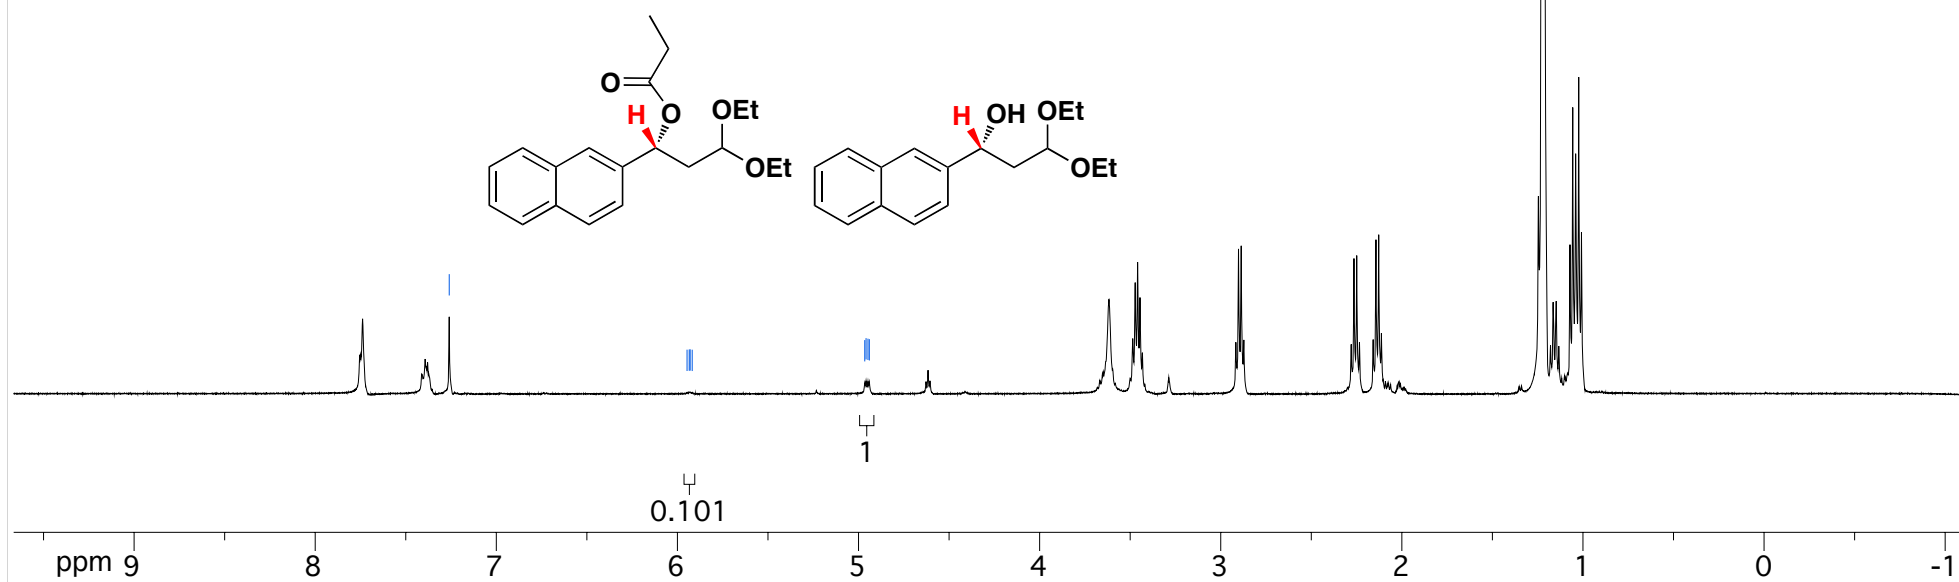

Wagner and Rychnovsky

 $^1\text{H}$  NMR in  $\text{CDCl}_3$  at 500 MHz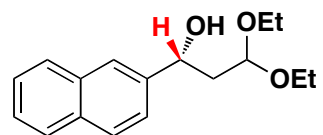

Entry 5 with S-HBTM

7.260

5.955  
5.943  
5.937  
5.9264.976  
4.969  
4.959  
4.952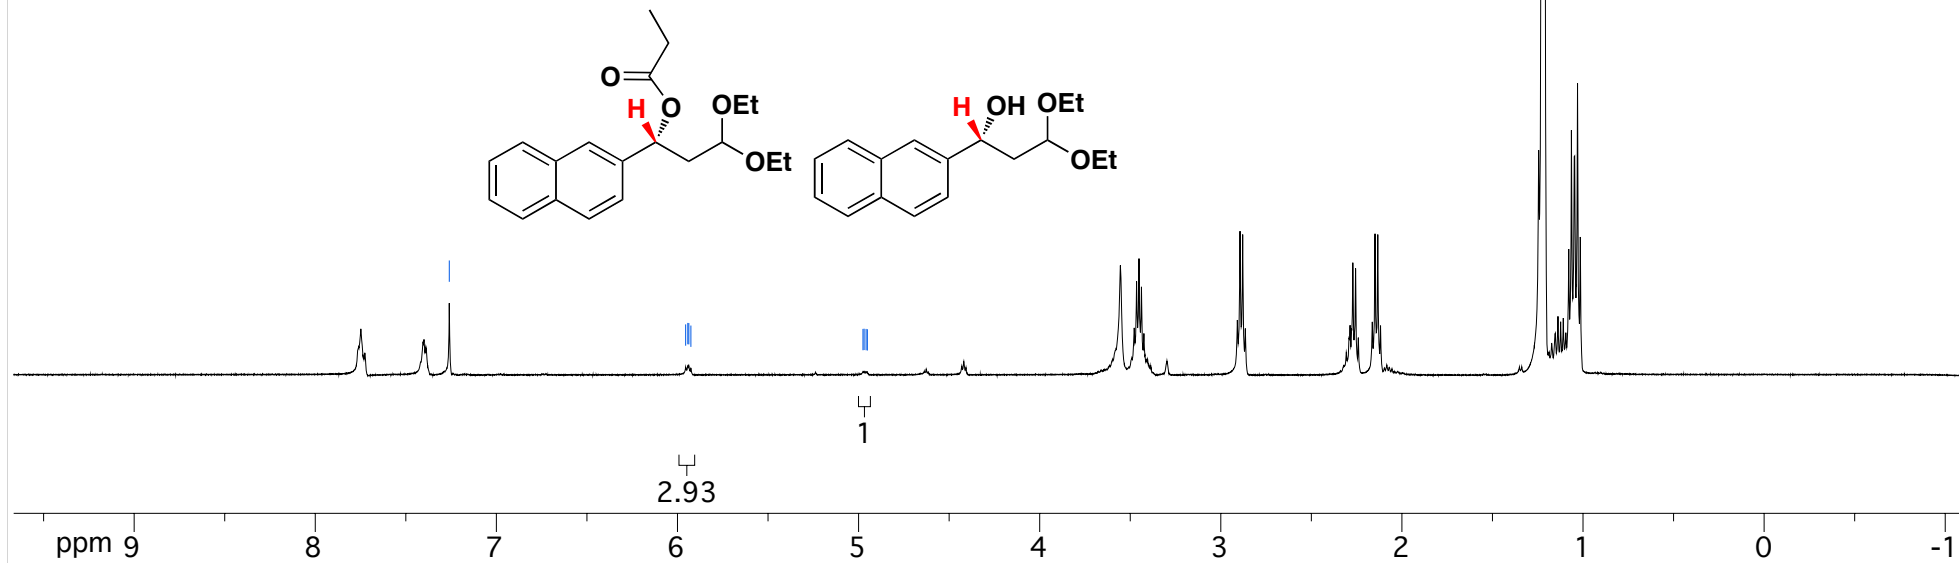

$^1\text{H}$  NMR in  $\text{CDCl}_3$  at 500 MHz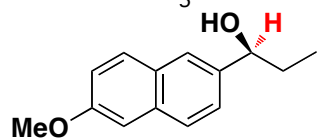

Entry 6 with R-HBTM

7.260

5.696  
5.682  
5.6684.592  
4.578  
4.566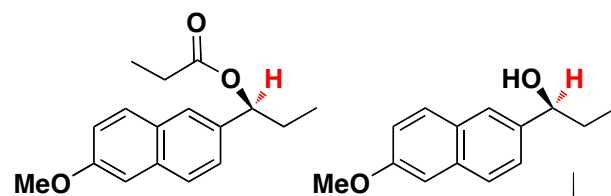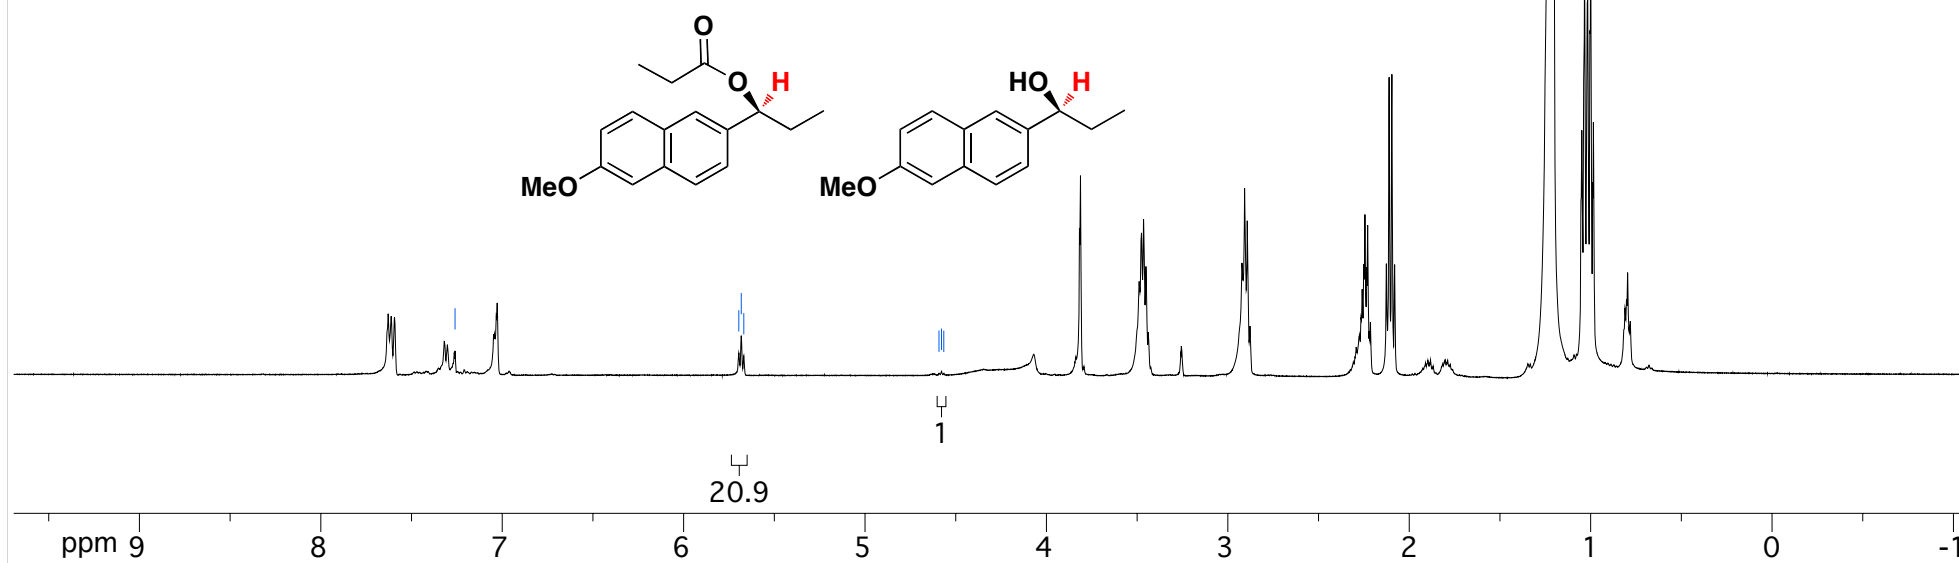

$^1\text{H}$  NMR in  $\text{CDCl}_3$  at 500 MHz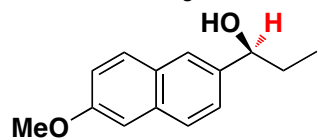

Entry 6 with S-HBTM

7.260  
7.2595.710  
5.696  
5.6824.608  
4.594  
4.581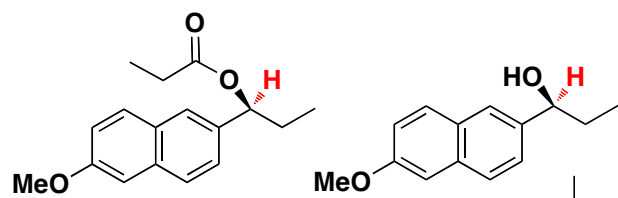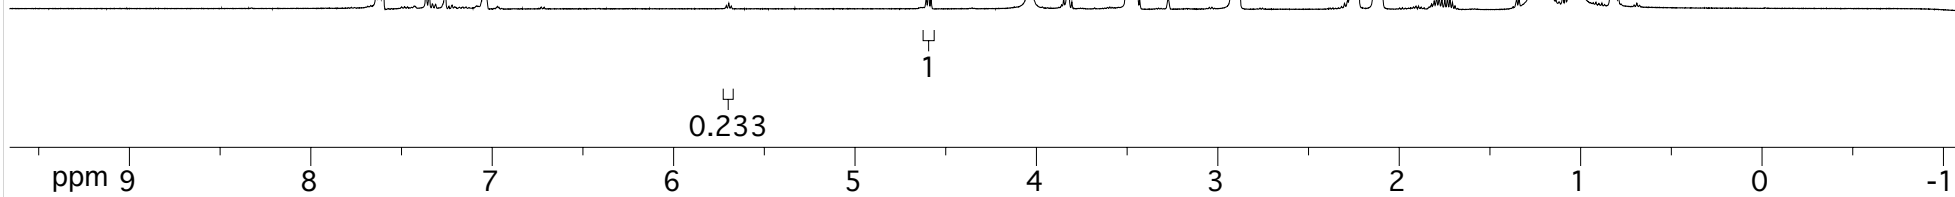

Wagner and Rychnovsky

 $^1\text{H}$  NMR in  $\text{CDCl}_3$  at 500 MHz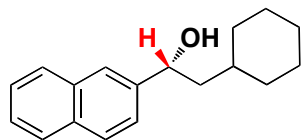

Entry 7 with R-HBTM

7.260

5.929  
5.916  
5.912  
5.9004.843  
4.832  
4.827  
4.816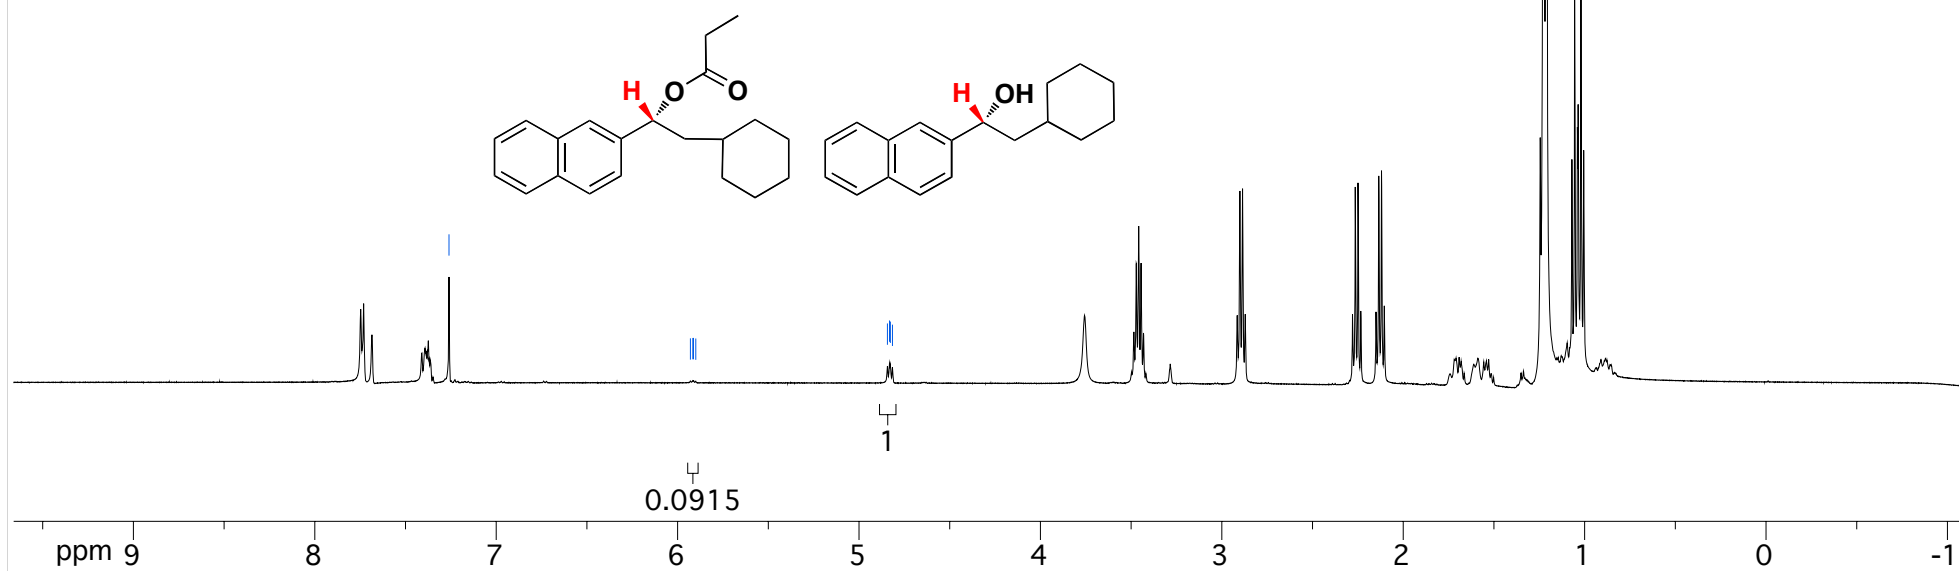



Wagner and Rychnovsky

 $^1\text{H}$  NMR in  $\text{CDCl}_3$  at 500 MHz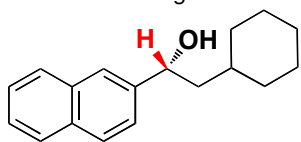

Entry 7 with S-HBTM

7.260

5.936  
5.924  
5.919  
5.9074.853  
4.841  
4.836  
4.824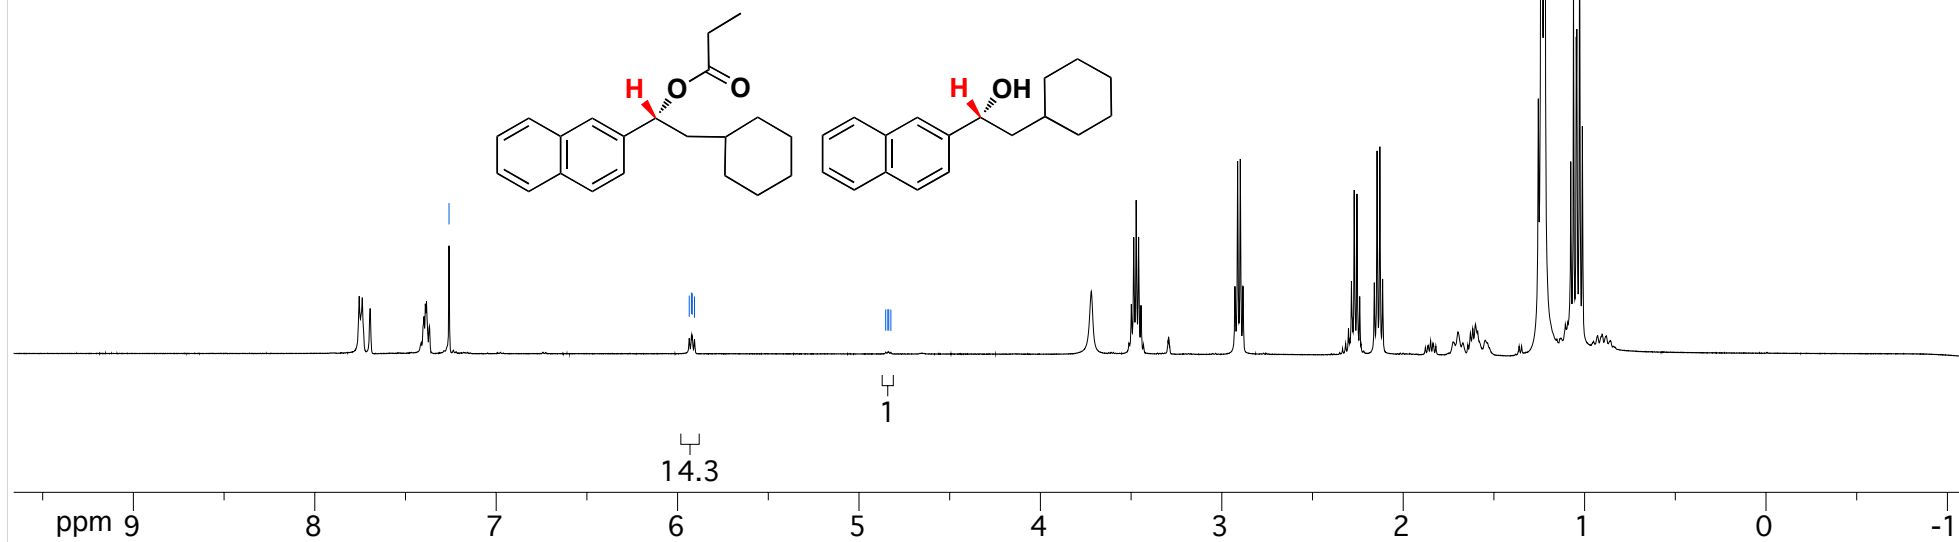

Wagner and Rychnovsky

 $^1\text{H}$  NMR in  $\text{CDCl}_3$  at 500 MHz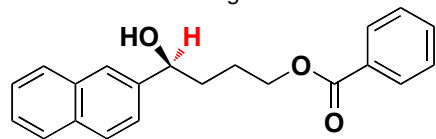

Entry 8 with R-HBTM

7.260

5.904

5.890

5.876

4.819

4.806

4.793

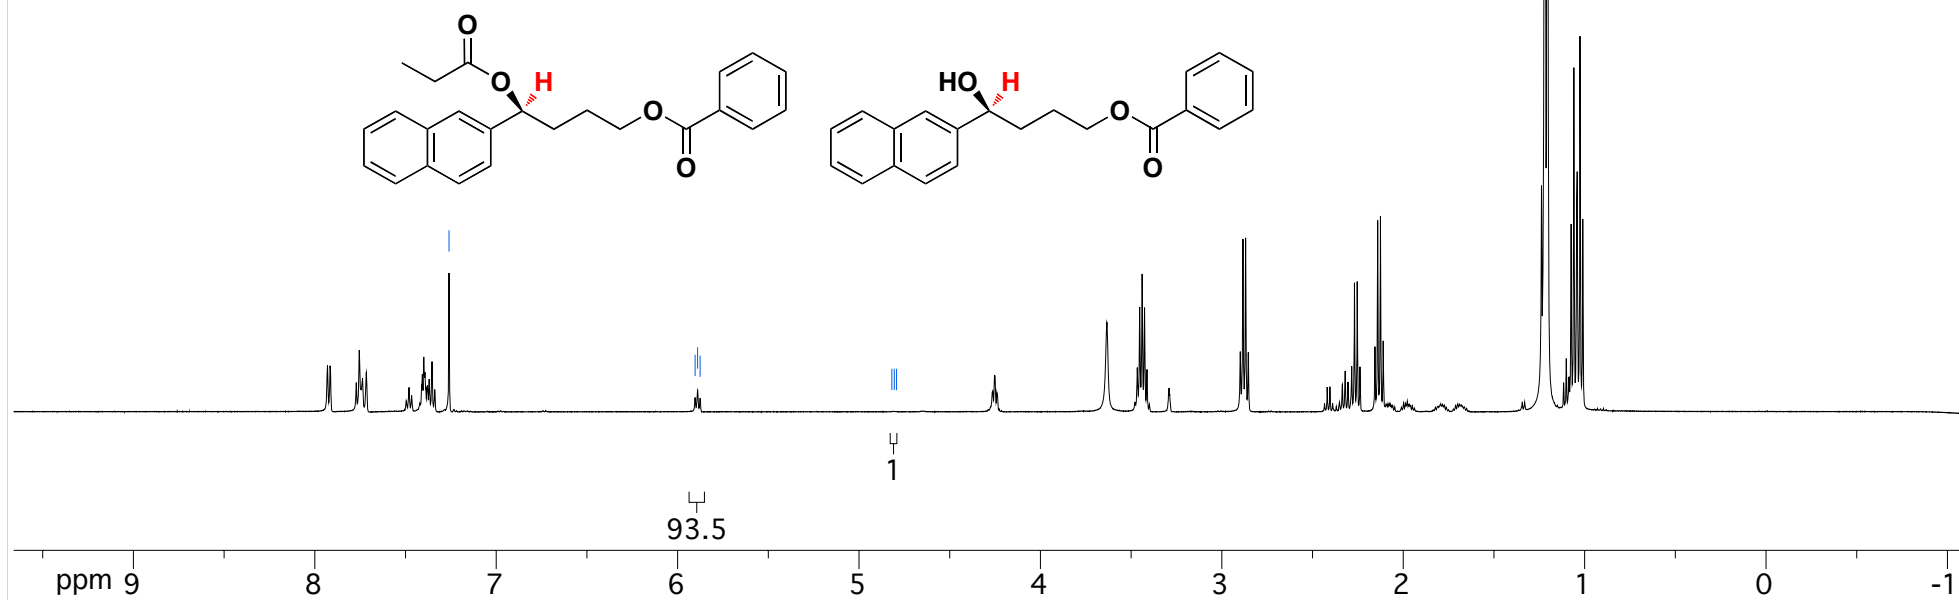

Wagner and Rychnovsky

 $^1\text{H}$  NMR in  $\text{CDCl}_3$  at 500 MHz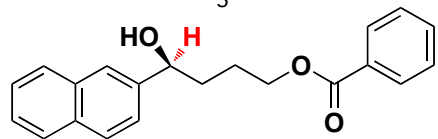

Entry 8 with S-HBTM

7.260

5.902  
5.889  
5.8754.817  
4.804  
4.792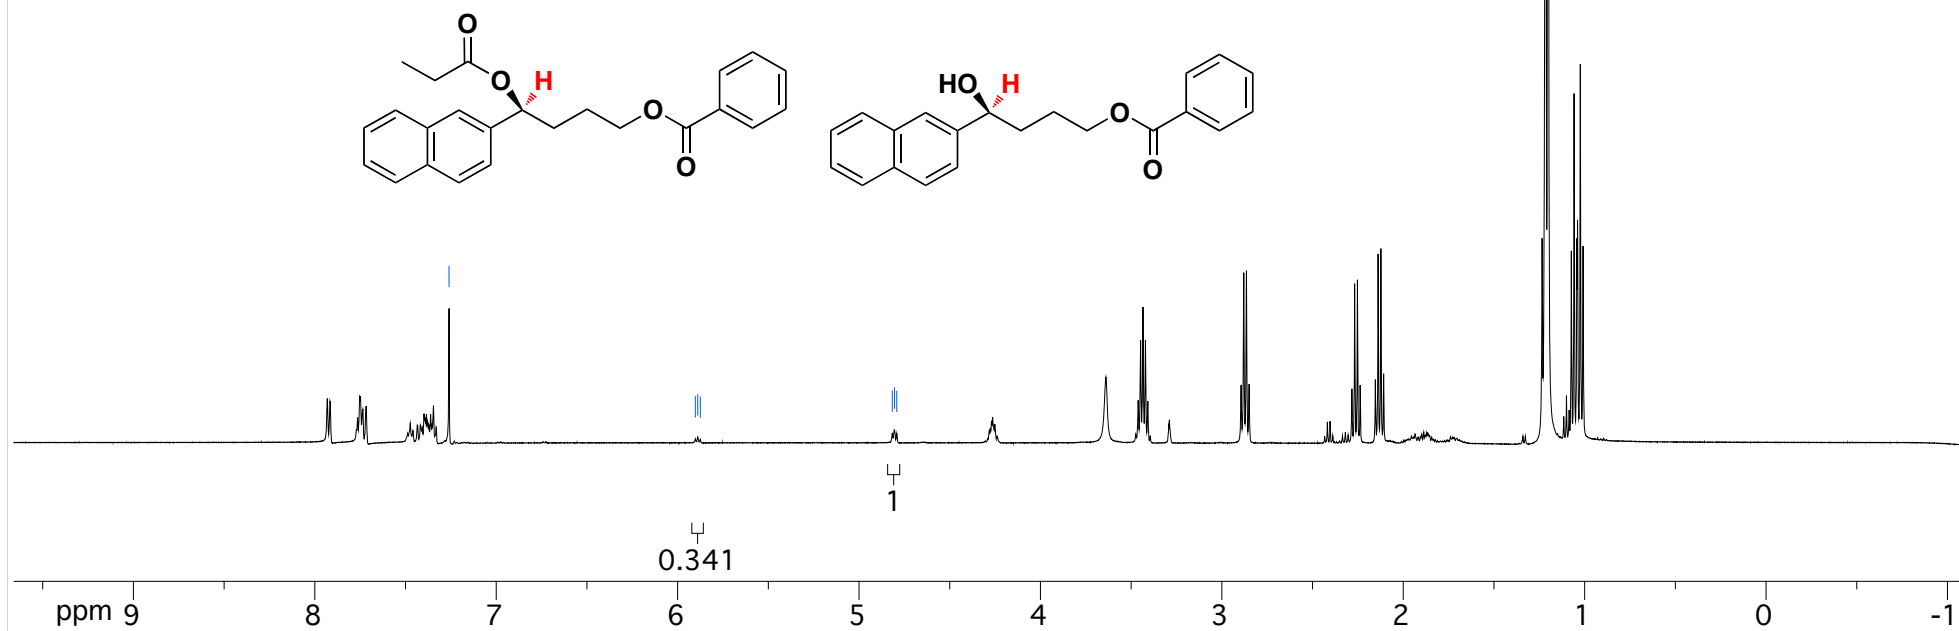

$^1\text{H}$  NMR in  $\text{CDCl}_3$  at 500 MHz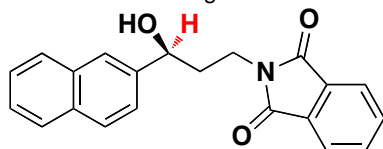

Entry 9 with R-HBTM

7.260

5.864  
5.851  
5.8374.808  
4.795  
4.782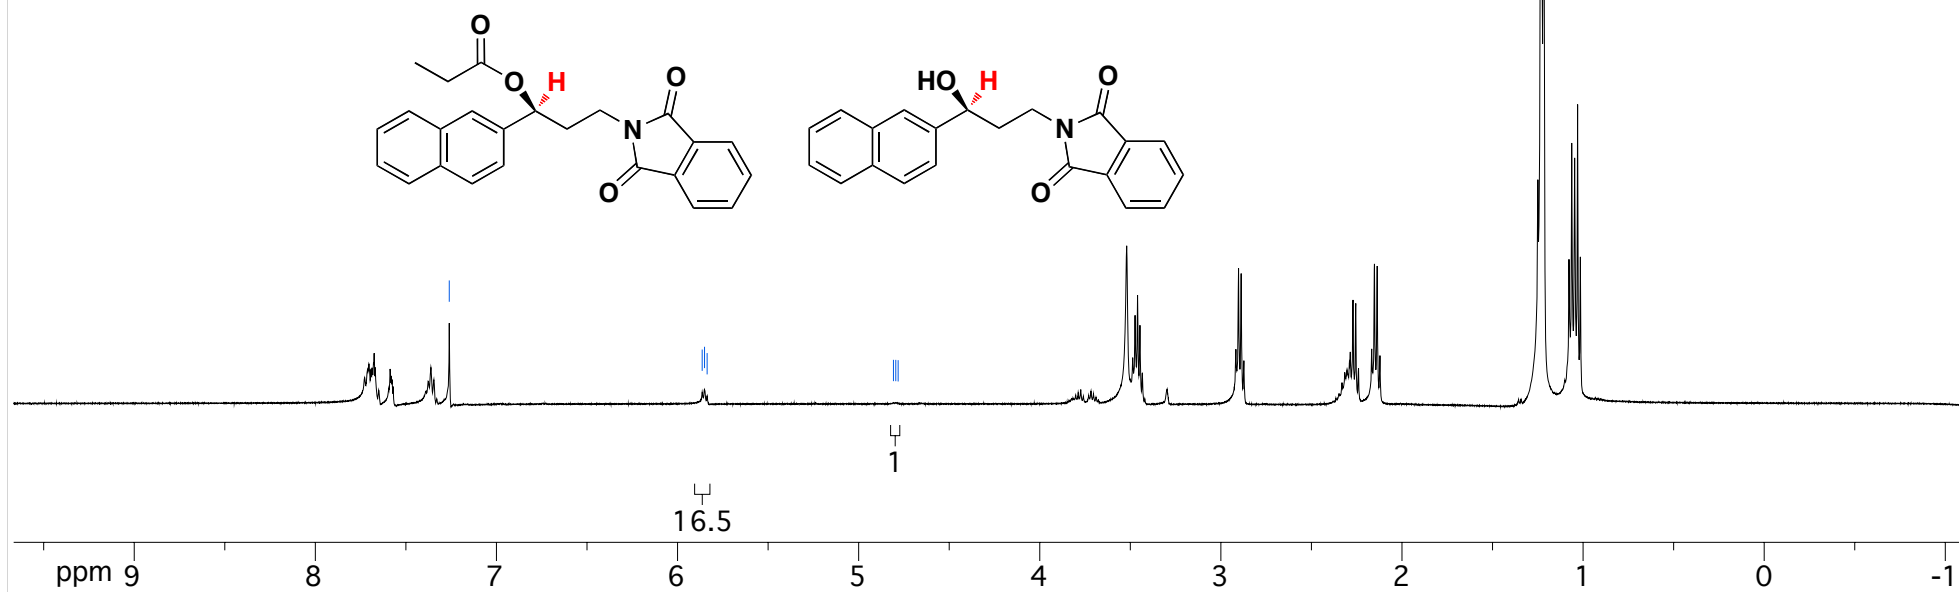

$^1\text{H}$  NMR in  $\text{CDCl}_3$  at 500 MHz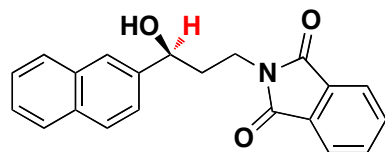

Entry 9 with S-HBTM

7.260

5.866  
5.855  
5.852  
5.8404.810  
4.799  
4.795  
4.784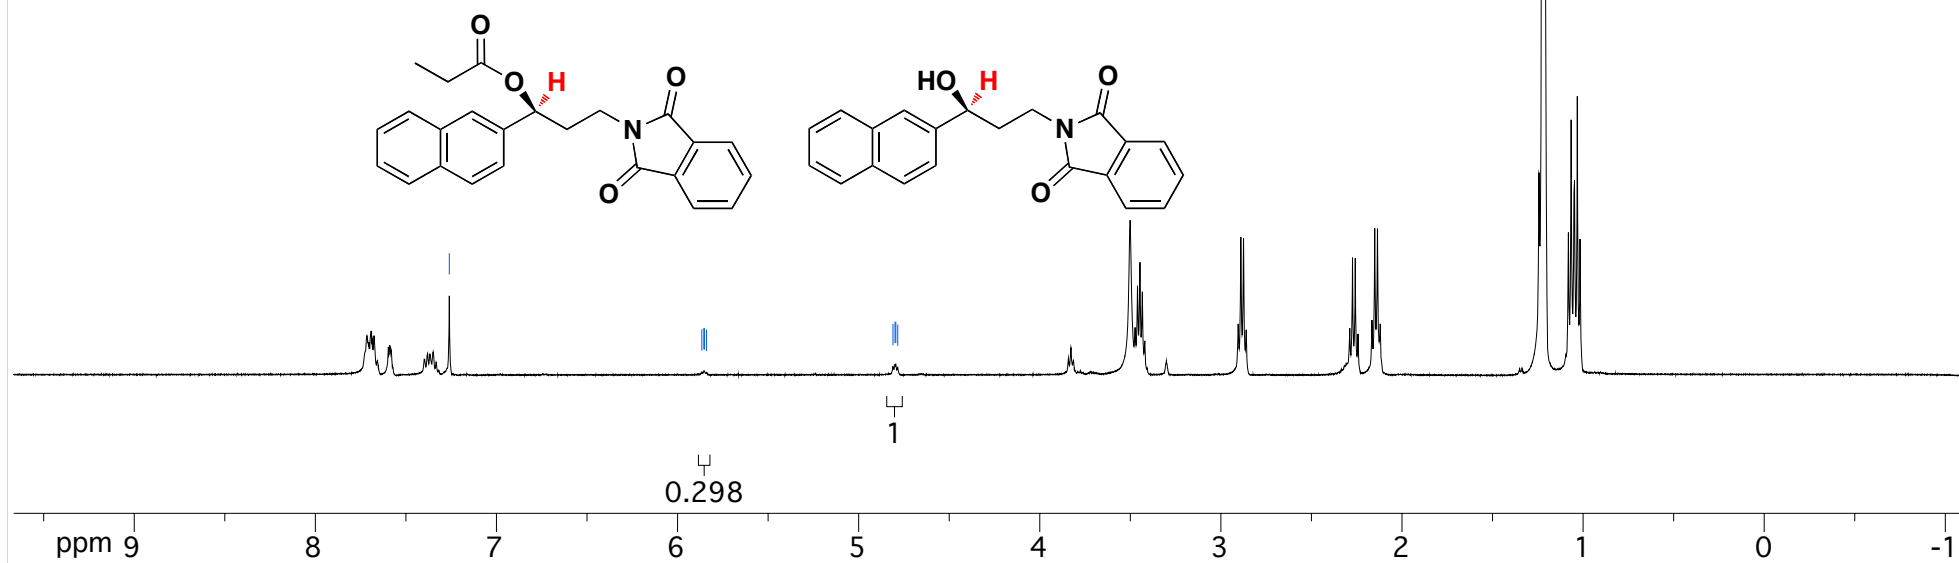

$^1\text{H}$  NMR in  $\text{CDCl}_3$  at 500 MHz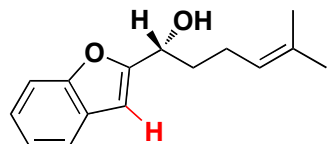

Entry 10 with R-HBTM

7.260

6.591  
6.527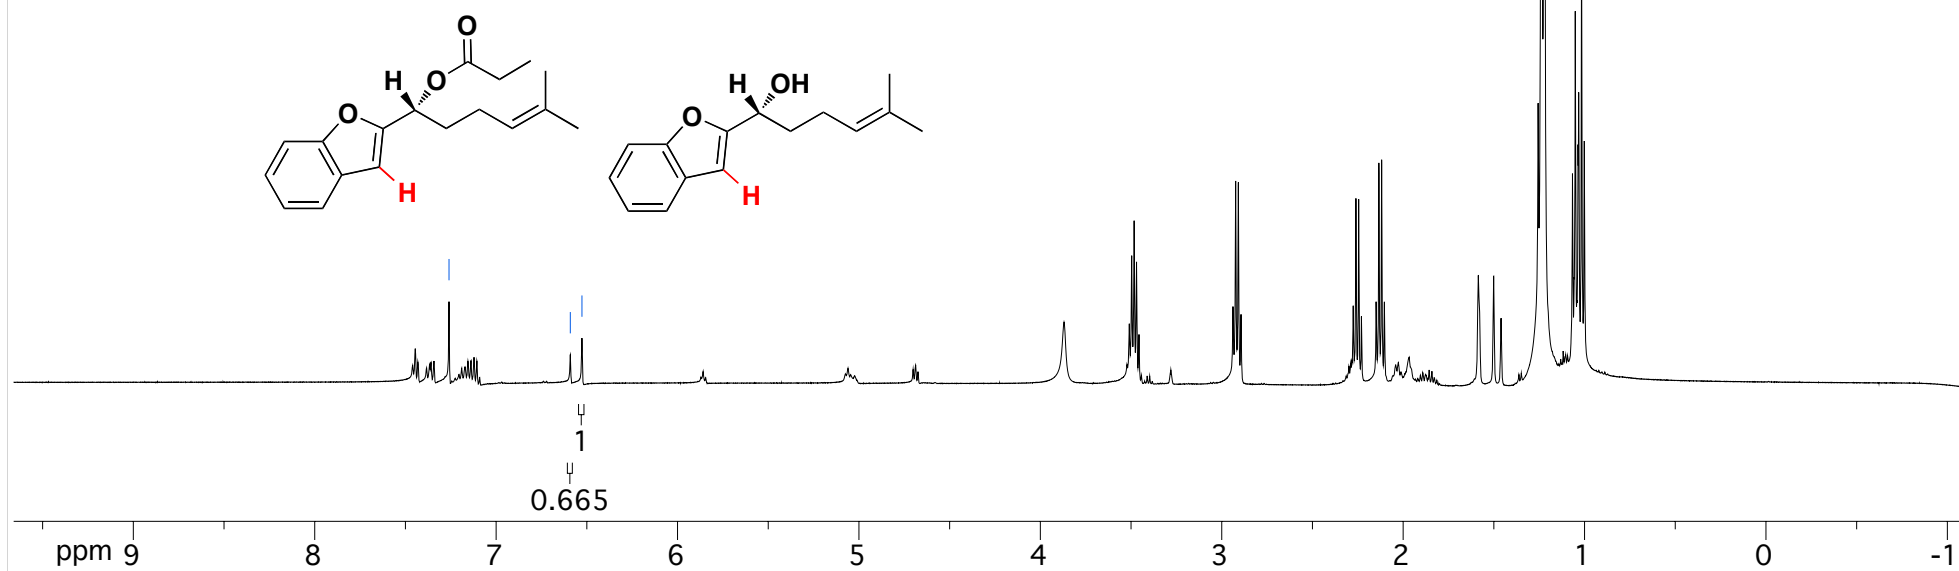

$^1\text{H}$  NMR in  $\text{CDCl}_3$  at 500 MHz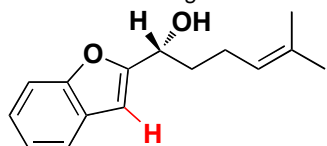

Entry 10 with S-HBTM

7.260

6.596  
6.532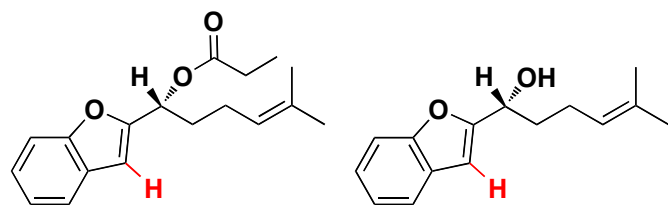

0.994

42.3

ppm 9

8

7

6

5

4

3

2

1

0

-1

Wagner and Rychnovsky

 $^1\text{H}$  NMR in  $\text{CDCl}_3$  at 500 MHz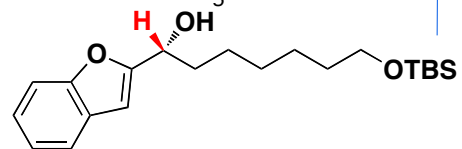

Entry 11 with R-HBTM

7.260

5.888  
5.874  
5.8594.707  
4.693  
4.680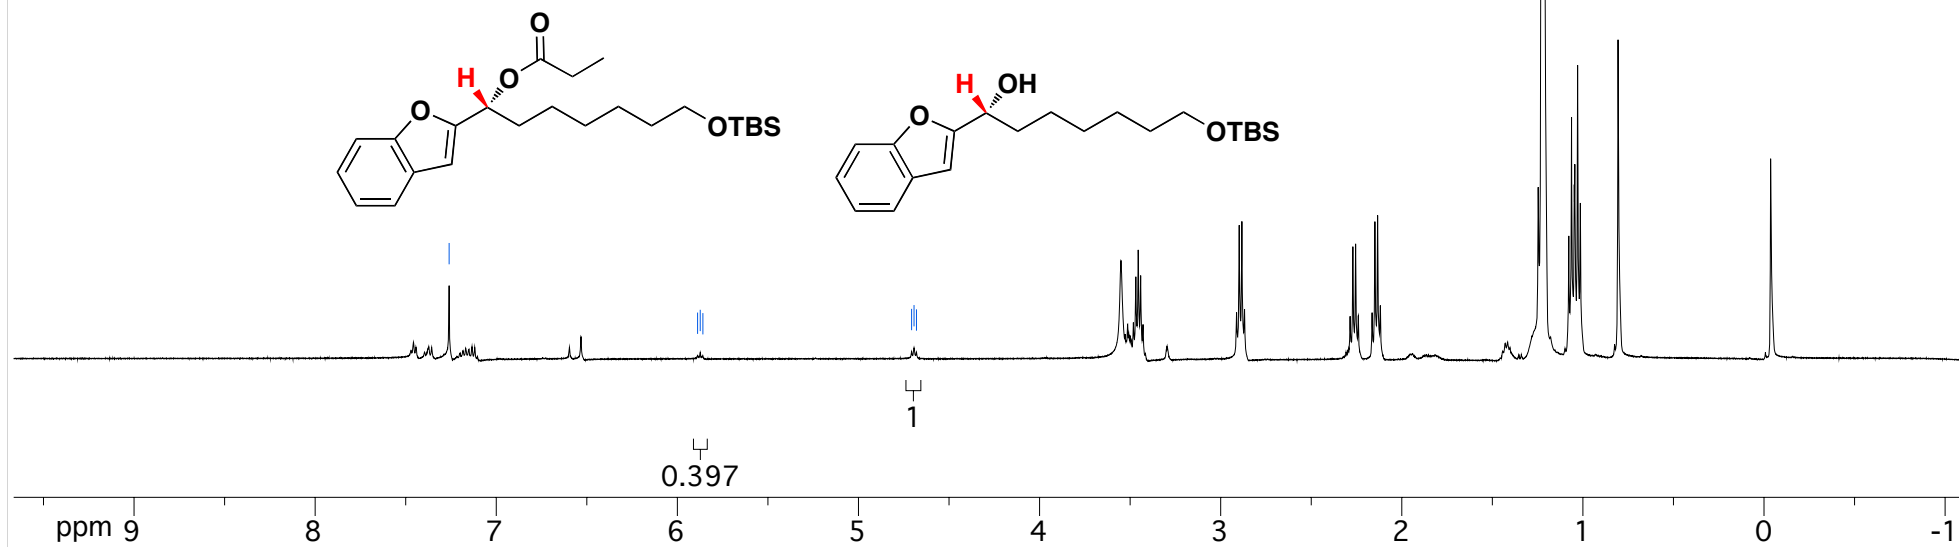



Wagner and Rychnovsky

 $^1\text{H}$  NMR in  $\text{CDCl}_3$  at 500 MHz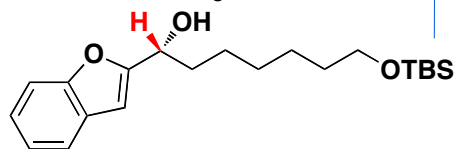

Entry 11 with S-HBTM

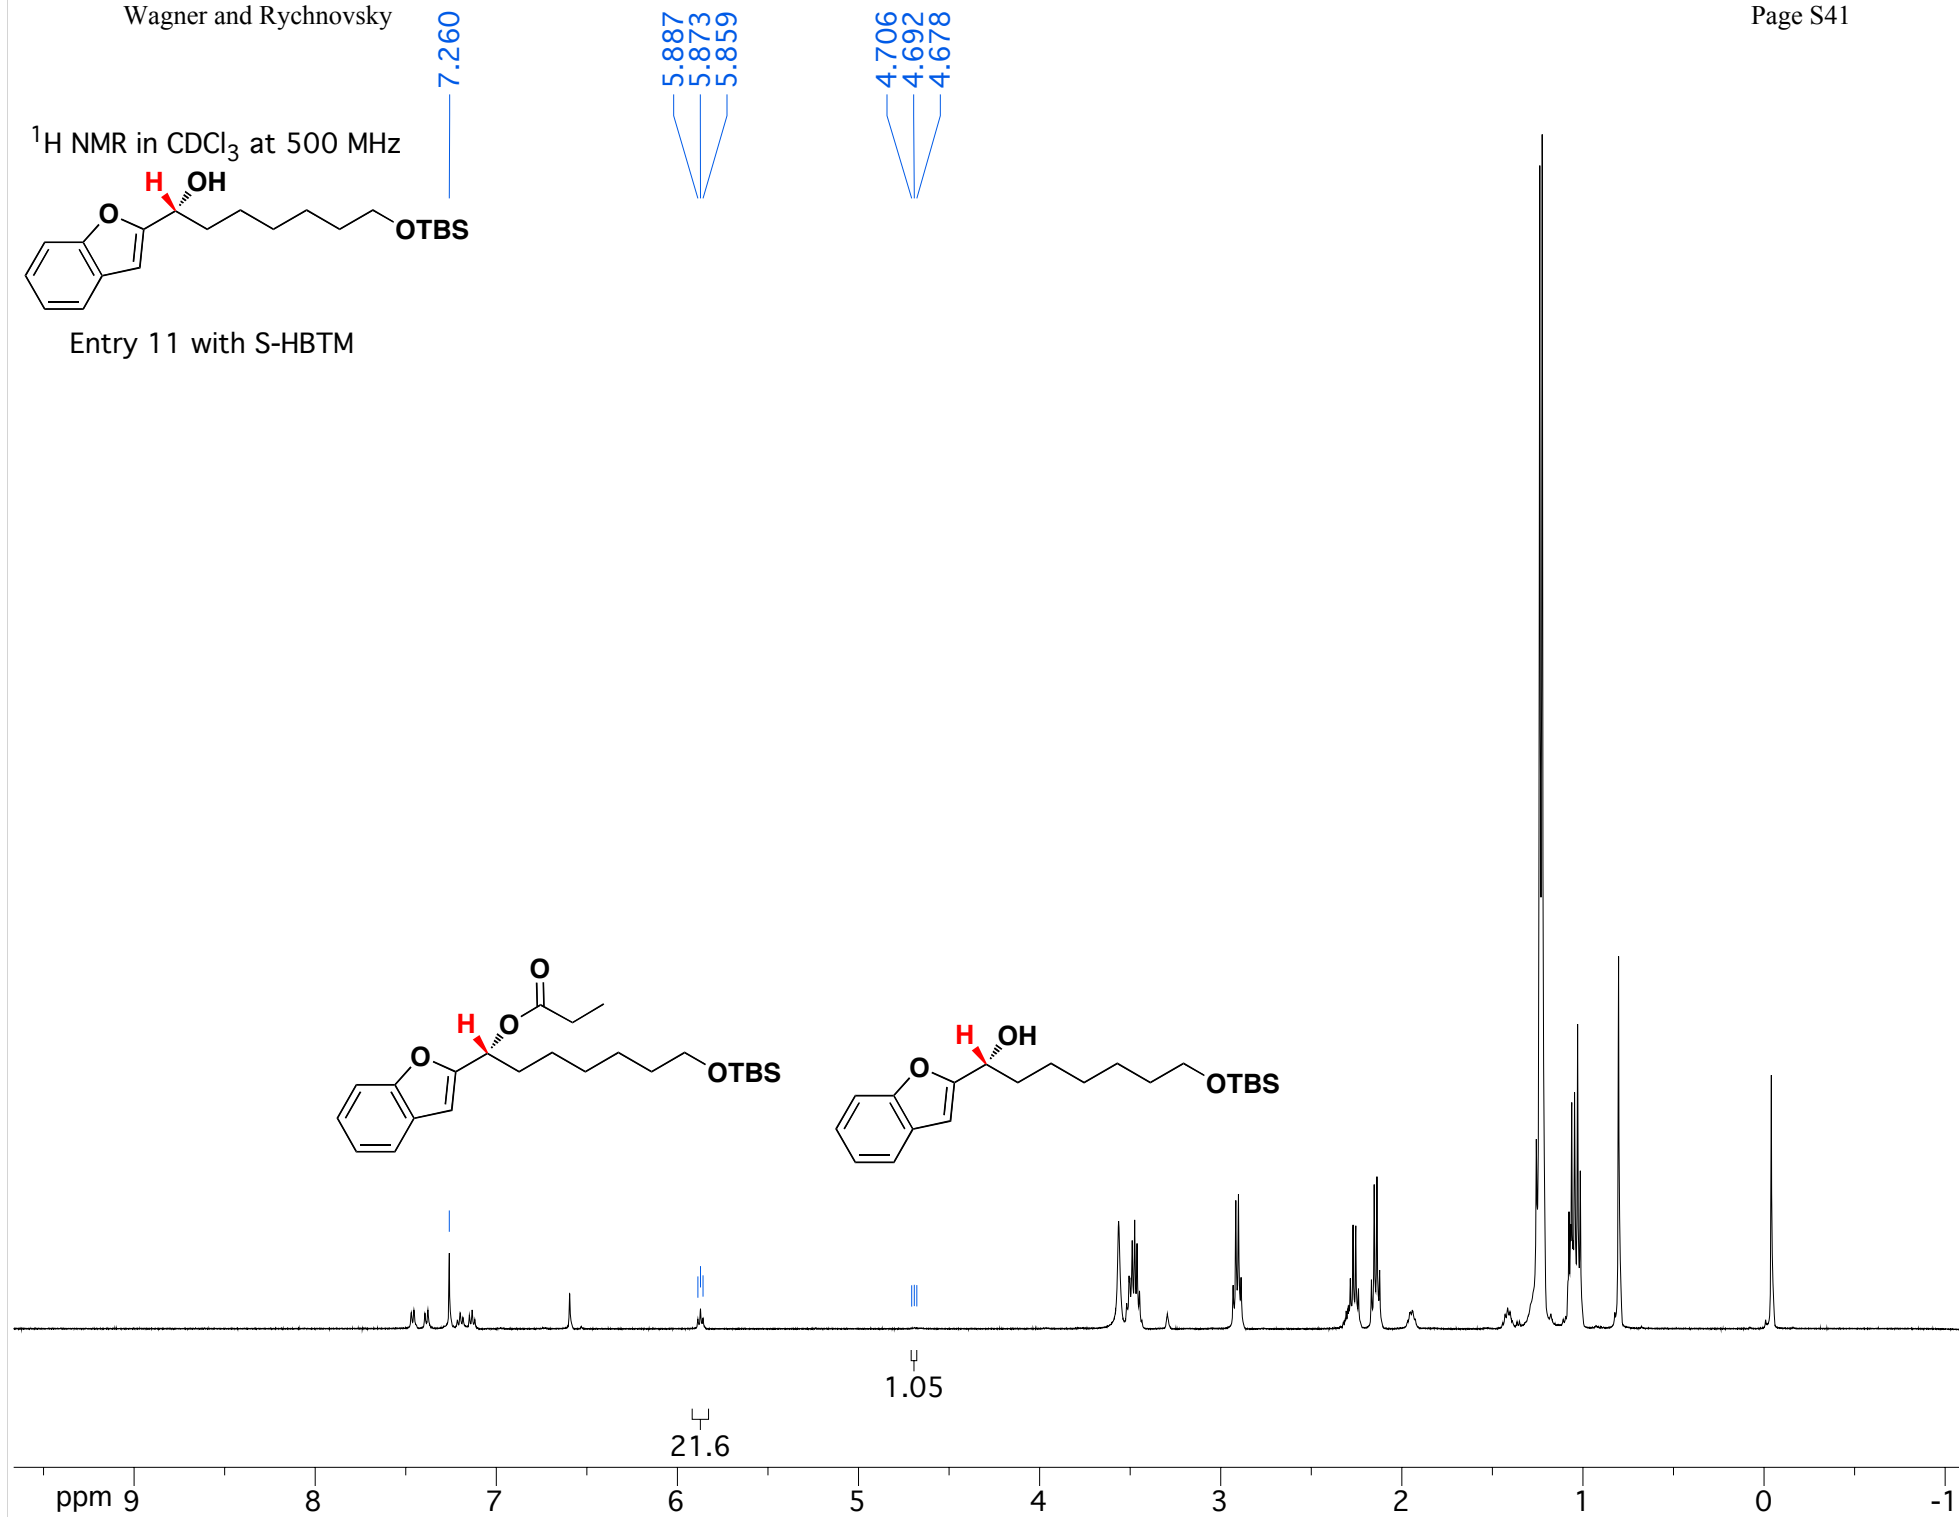

$^1\text{H}$  NMR in  $\text{CDCl}_3$  at 500 MHz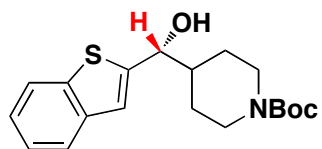

Entry 12 with R-HBTM

7.260

5.794  
5.7774.610  
4.596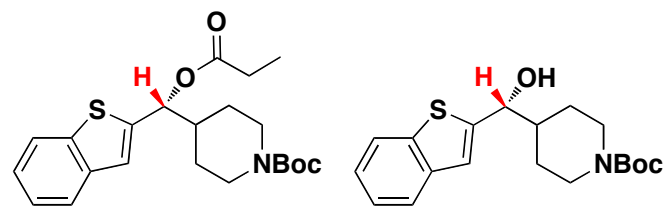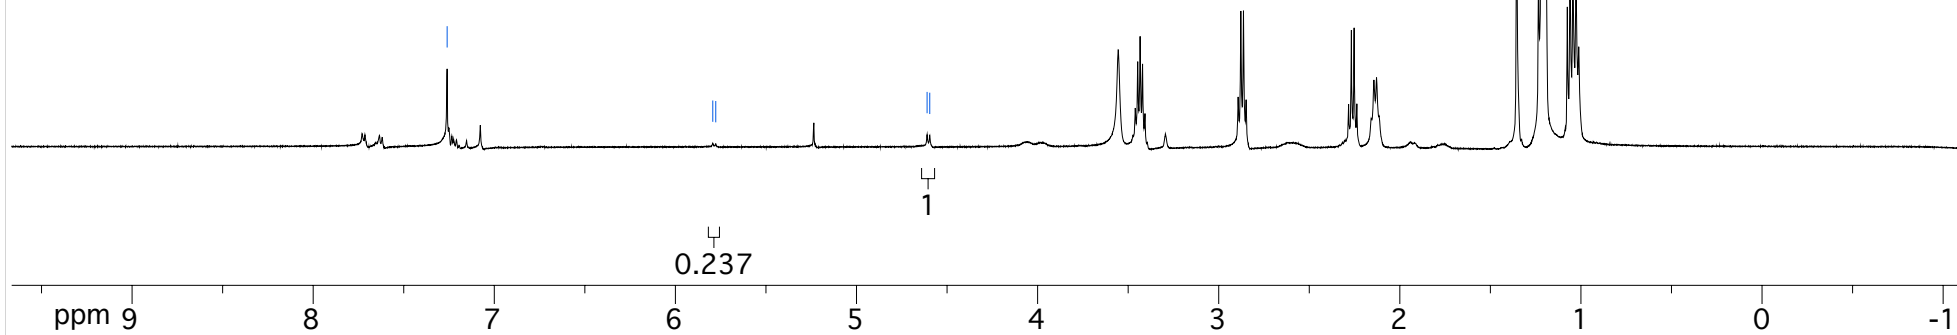

<sup>1</sup>H NMR in CDCl<sub>3</sub> at 500 MHz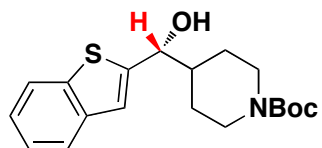

Entry 12 with S-HBTM

7.260

5.792  
5.7764.609  
4.593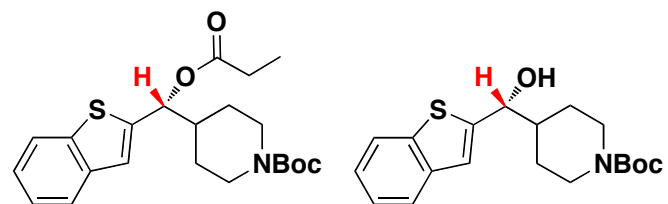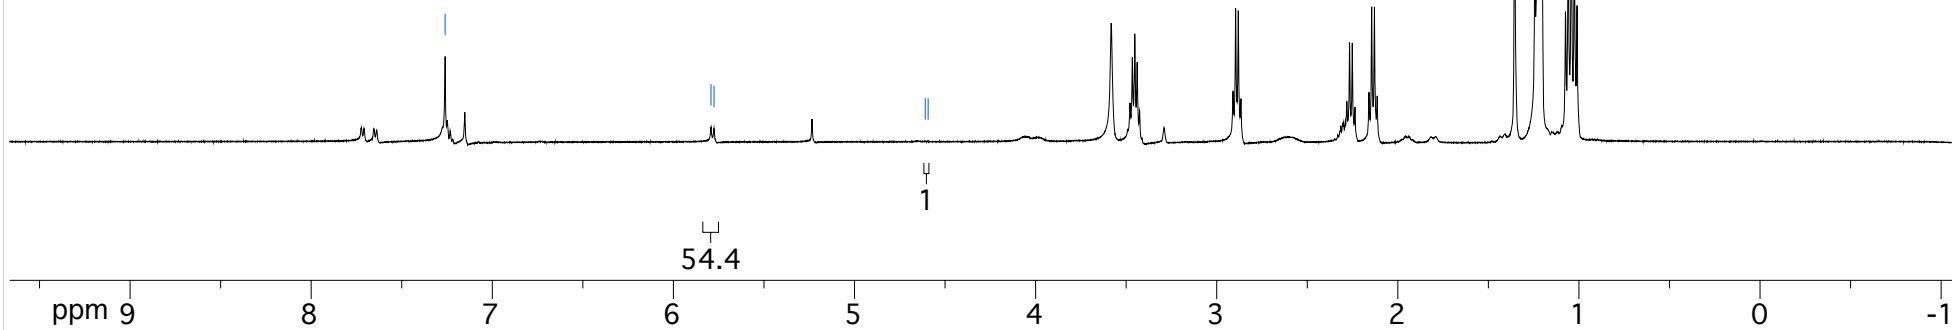

$^1\text{H}$  NMR in  $\text{CDCl}_3$  at 500 MHz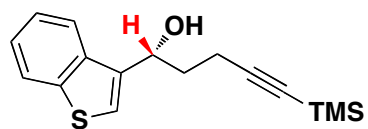

Entry 13 with R-HBTM

7.260

6.241  
6.230  
6.2195.196  
5.188  
5.180  
5.171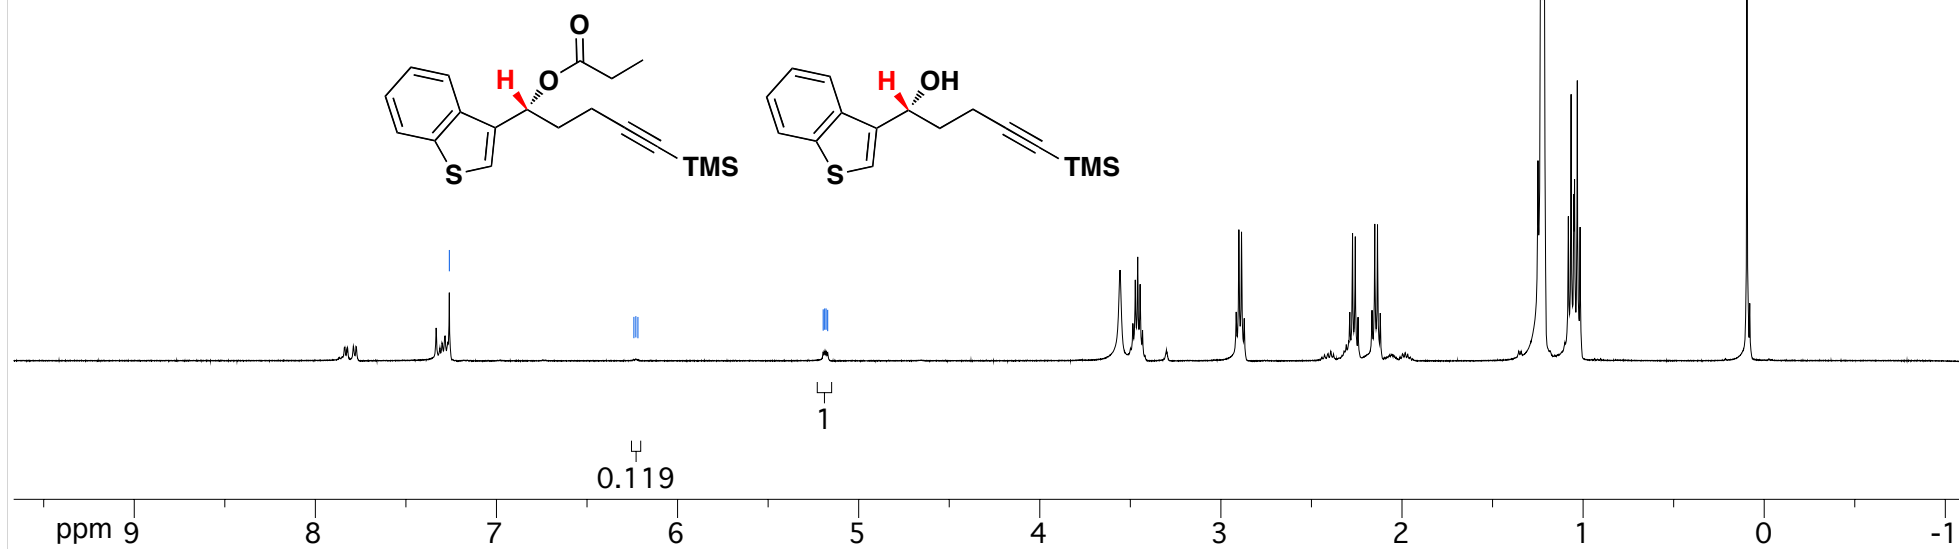

<sup>1</sup>H NMR in CDCl<sub>3</sub> at 500 MHz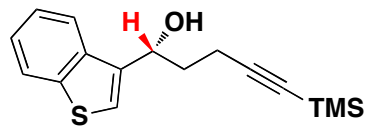

Entry 13 with S-HBTM

7.260

6.244  
6.231  
6.2195.199  
5.190  
5.181  
5.172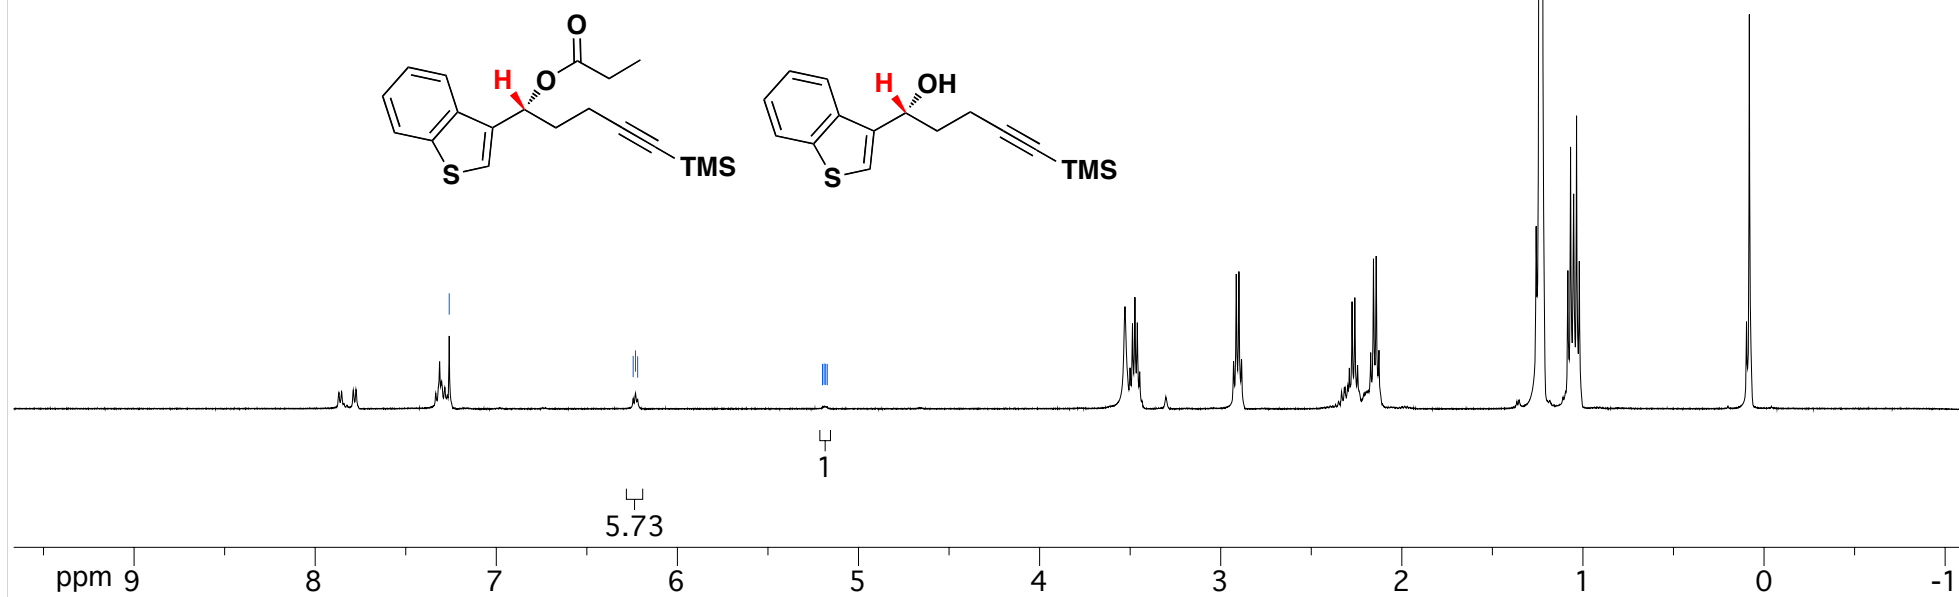

## Chiral Analytical Traces for Entries 1-3, 6-7.

*HPLC determinations of enantiopurity were performed on an Agilent 1100 Series instrument using isopropyl alcohol (OmniSolv®) and n-hexane (HPLC grade, 95% min) with Daicel™ columns.*

### Entry 1 (S47-S48):

**HPLC** analysis (Chiralcel® OD with OD guard, 5.0% *i*PrOH/n-Hexane, 1.0 mL/min) indicated >99:<1 er;  $t_R$  (major) = 9.6 minutes,  $t_R$  (minor) = 12.4 minutes.

### Entry 2 (S49-S50):

**HPLC** analysis (Chiralpak® OB-H with OB guard, 5.0% *i*PrOH/n-Hexane, 0.80 mL/min) indicated 85:15 er;  $t_R$  (major) = 9.6 minutes,  $t_R$  (minor) = 11.1 minutes.

### Entry 3 (S51-S52):

**HPLC** analysis (Chiralpak® AD with AD guard, 5.0% *i*PrOH/n-Hexane, 1.0 mL/min) indicated 98:2 er;  $t_R$  (major) = 12.0 minutes,  $t_R$  (minor) = 13.5 minutes.

*SFC determinations of enantiopurity were performed on a Berger Analytical instrument using a Daicel™ column (100 bar, 50 °C, 215 nm).*

### Entry 6 (S53-S54):

**SFC** analysis (Chiralpak® OD-H, 12.5% *i*PrOH, 3.0 mL/min) indicated 97:3 er;  $t_R$  (major) = 5.3 minutes,  $t_R$  (minor) = 6.5 minutes.

### Entry 7 (S55-S56):

**SFC** analysis (Chiralpak® AS-H, 3.0% *i*PrOH, 3.0 mL/min) indicated 98:2 er;  $t_R$  (minor) = 12.2 minutes,  $t_R$  (major) = 12.8 minutes.

Column OD with guard 5% iPrOH/Hexanes 1.00 mL 38 bar

=====  
 Injection Date : 9/28/2012 4:44:16 PM  
 Sample Name : SN-1-133-RacOH Location : Vial 42  
 Acq. Operator : Alex Inj Volume : 10 µl  
 Acq. Method : C:\HPCHEM\1\METHODS\ALEX.M  
 Last changed : 9/28/2012 4:44:17 PM by Alex  
 (modified after loading)  
 Analysis Method : C:\HPCHEM\1\METHODS\ALEX.M  
 Last changed : 2/20/2013 2:04:00 PM by Alex

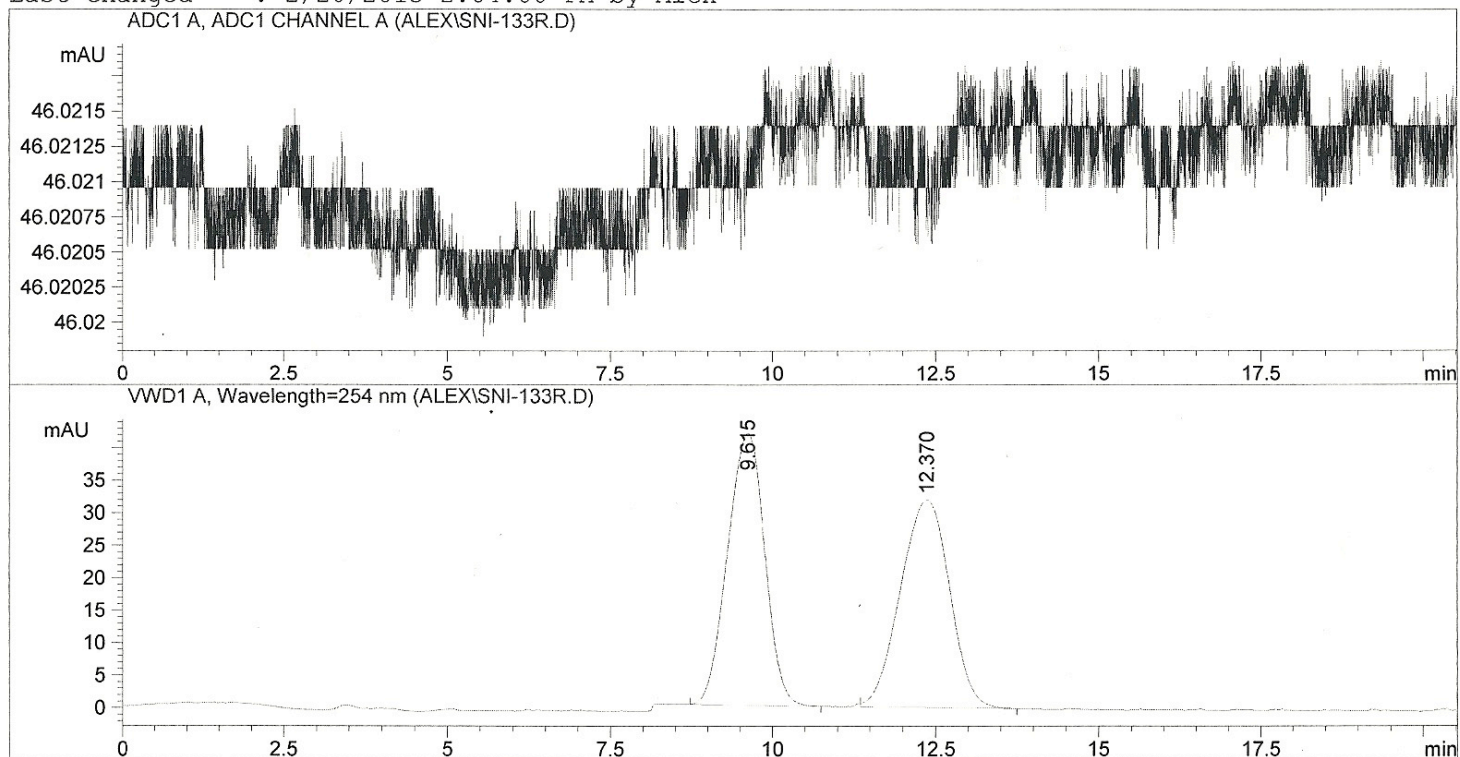

=====  
 Area Percent Report  
 =====

Sorted By : Signal  
 Multiplier : 1.0000  
 Dilution : 1.0000  
 Sample Amount : 10.00000 [ng/ul] (not used in calc.)  
 Use Multiplier & Dilution Factor with ISTDs

Signal 1: ADC1 A, ADC1 CHANNEL A

Signal 2: VWD1 A, Wavelength=254 nm

| Peak # | RetTime [min] | Type | Width [min] | Area mAU *s | Height [mAU] | Area %  |
|--------|---------------|------|-------------|-------------|--------------|---------|
| 1      | 9.615         | BB   | 0.6355      | 1675.50940  | 41.89484     | 50.0590 |
| 2      | 12.370        | VB   | 0.7585      | 1671.56042  | 31.97147     | 49.9410 |

Totals : 3347.06982 73.86631

Results obtained with enhanced integrator!

=====  
 \*\*\* End of Report \*\*\*

Column OD with guard 5% iPrOH/Hexanes 1.00 mL 38 bar

=====  
 Injection Date : 9/28/2012 4:22:04 PM  
 Sample Name : SN-1-133-OH Location : Vial 41  
 Acq. Operator : Alex Inj Volume : 10 µl  
 Acq. Method : C:\HPCHEM\1\METHODS\ALEX.M  
 Last changed : 9/28/2012 3:34:42 PM by Alex  
 (modified after loading)  
 Analysis Method : C:\HPCHEM\1\METHODS\ALEX.M  
 Last changed : 2/20/2013 2:04:00 PM by Alex

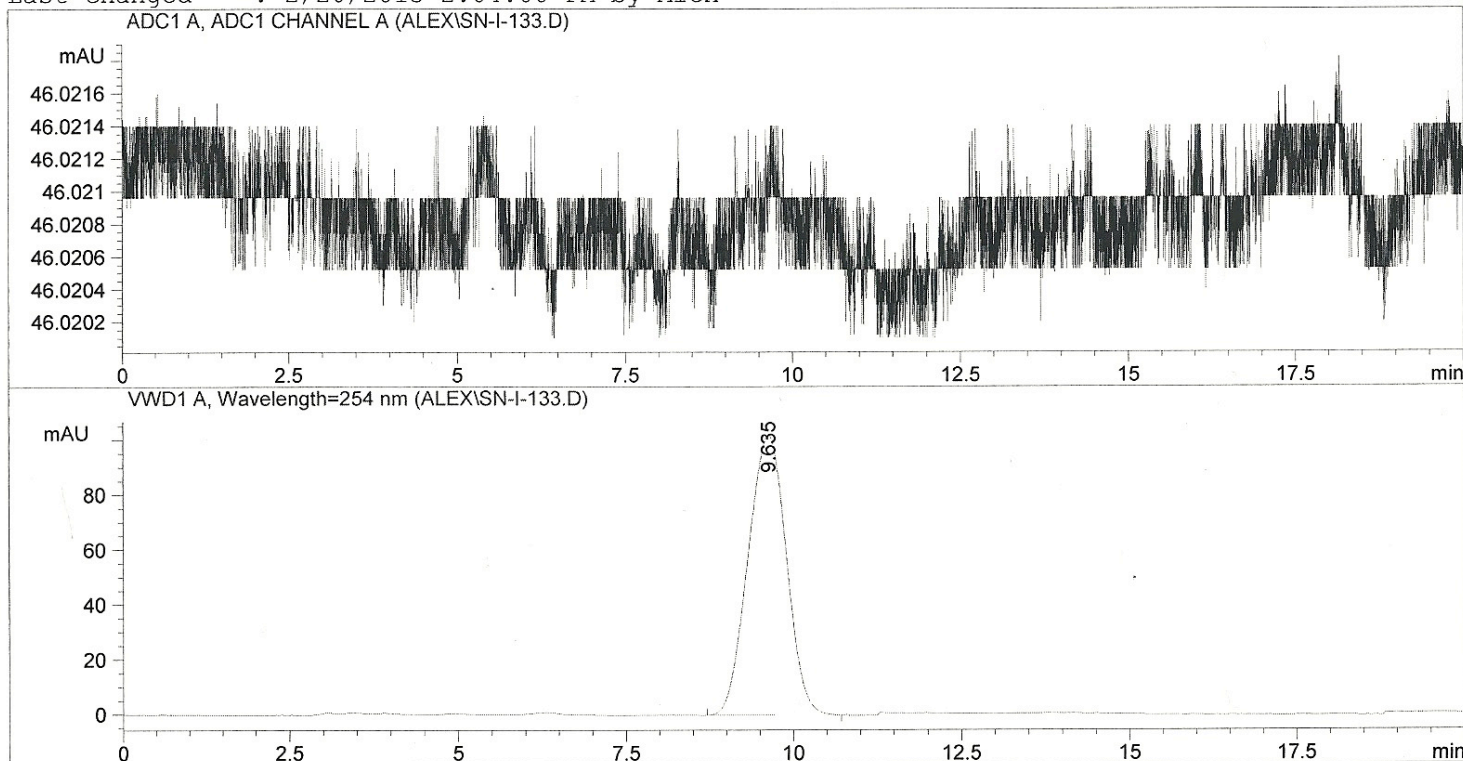

=====  
 Area Percent Report  
 =====

Sorted By : Signal  
 Multiplier : 1.0000  
 Dilution : 1.0000  
 Sample Amount : 10.00000 [ng/ul] (not used in calc.)  
 Use Multiplier & Dilution Factor with ISTDs

Signal 1: ADC1 A, ADC1 CHANNEL A

Signal 2: VWD1 A, Wavelength=254 nm

| Peak # | RetTime [min] | Type | Width [min] | Area mAU   | Height [mAU] | Area %   |
|--------|---------------|------|-------------|------------|--------------|----------|
| 1      | 9.635         | BB   | 0.6300      | 4094.94434 | 102.00067    | 100.0000 |

Totals : 4094.94434 102.00067

Results obtained with enhanced integrator!

=====  
 \*\*\* End of Report \*\*\*



Wagner and Rychnovsky

=====  
Acq. Operator : Alex  
Acq. Instrument : Instrument 2 Location : Vial 61  
Injection Date : 2/25/2013 2:32:16 PM Inj Volume : 30 µl  
Acq. Method : C:\CHEM32\2\METHODS\JONLAM.M  
Last changed : 2/25/2013 2:30:49 PM by Alex  
(modified after loading)  
Analysis Method : C:\CHEM32\2\DATA\JONLAM\JKL-04-154.D\DA.M (JONLAM.M)  
Last changed : 2/25/2013 1:10:16 PM by Jon Lam  
Sample Info : Chiralpak OB-H + OB Guard, 5% IPA/Hexanes, 0.8 ml/min,  
42 bar

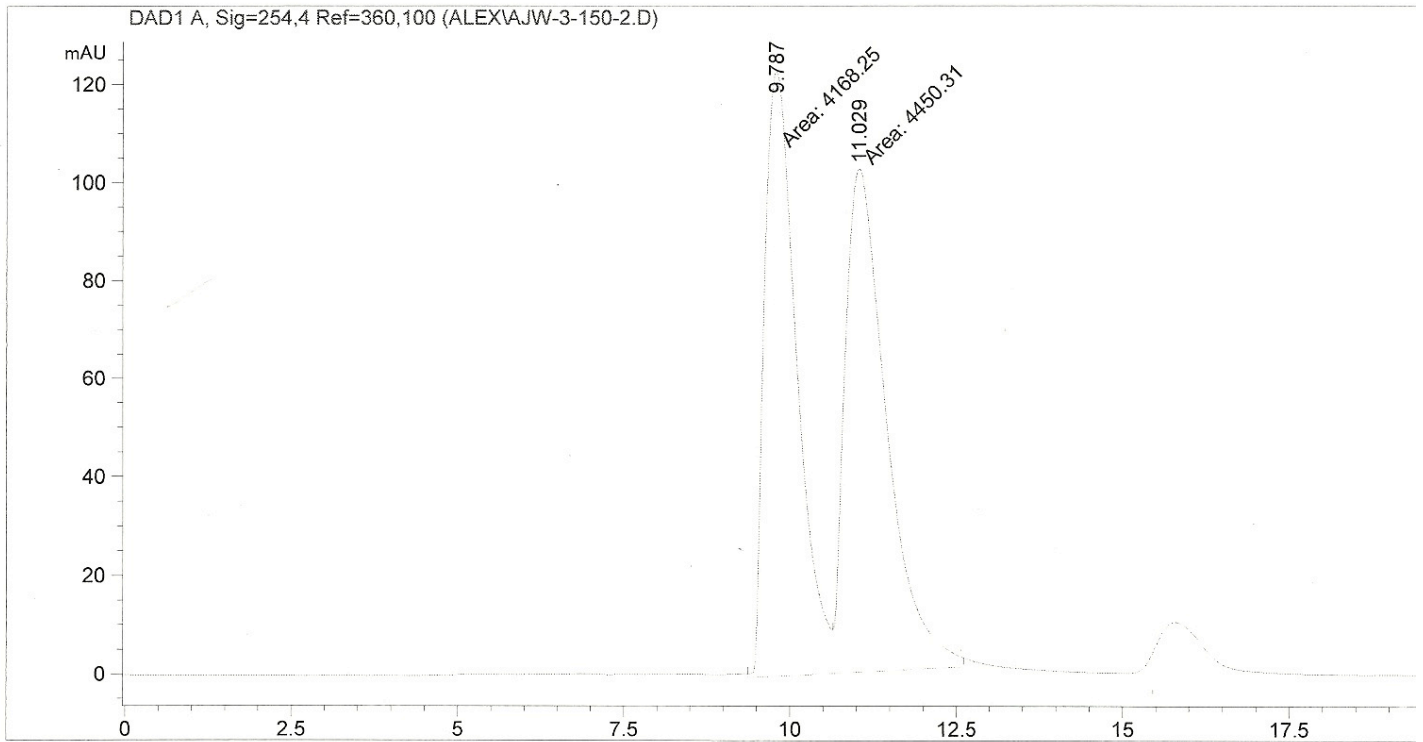

=====  
Area Percent Report  
=====

Sorted By : Signal  
Multiplier: : 1.0000  
Dilution: : 1.0000  
Sample Amount: : 1.00000 [ng/ul] (not used in calc.)  
Use Multiplier & Dilution Factor with ISTDs

Signal 1: DAD1 A, Sig=254,4 Ref=360,100

| Peak # | RetTime [min] | Type | Width [min] | Area [mAU*s] | Height [mAU] | Area %  |
|--------|---------------|------|-------------|--------------|--------------|---------|
| 1      | 9.787         | MF   | 0.5648      | 4168.24658   | 123.00746    | 48.3636 |
| 2      | 11.029        | FM   | 0.7247      | 4450.30811   | 102.34229    | 51.6364 |

Totals : 8618.55469 225.34975

=====  
Acq. Operator : Alex  
Acq. Instrument : Instrument 2  
Injection Date : 2/25/2013 2:54:32 PM  
Location : Vial 62  
Inj Volume : 30 µl  
Acq. Method : C:\CHEM32\2\METHODS\JONLAM.M  
Last changed : 2/25/2013 2:52:37 PM by Alex  
(modified after loading)  
Analysis Method : C:\CHEM32\2\DATA\JONLAM\JKL-04-154.D\DA.M (JONLAM.M)  
Last changed : 2/25/2013 1:10:16 PM by Jon Lam  
Sample Info : Chiralpak OB-H + OB Guard, 5% IPA/Hexanes, 0.8 ml/min,  
42 bar

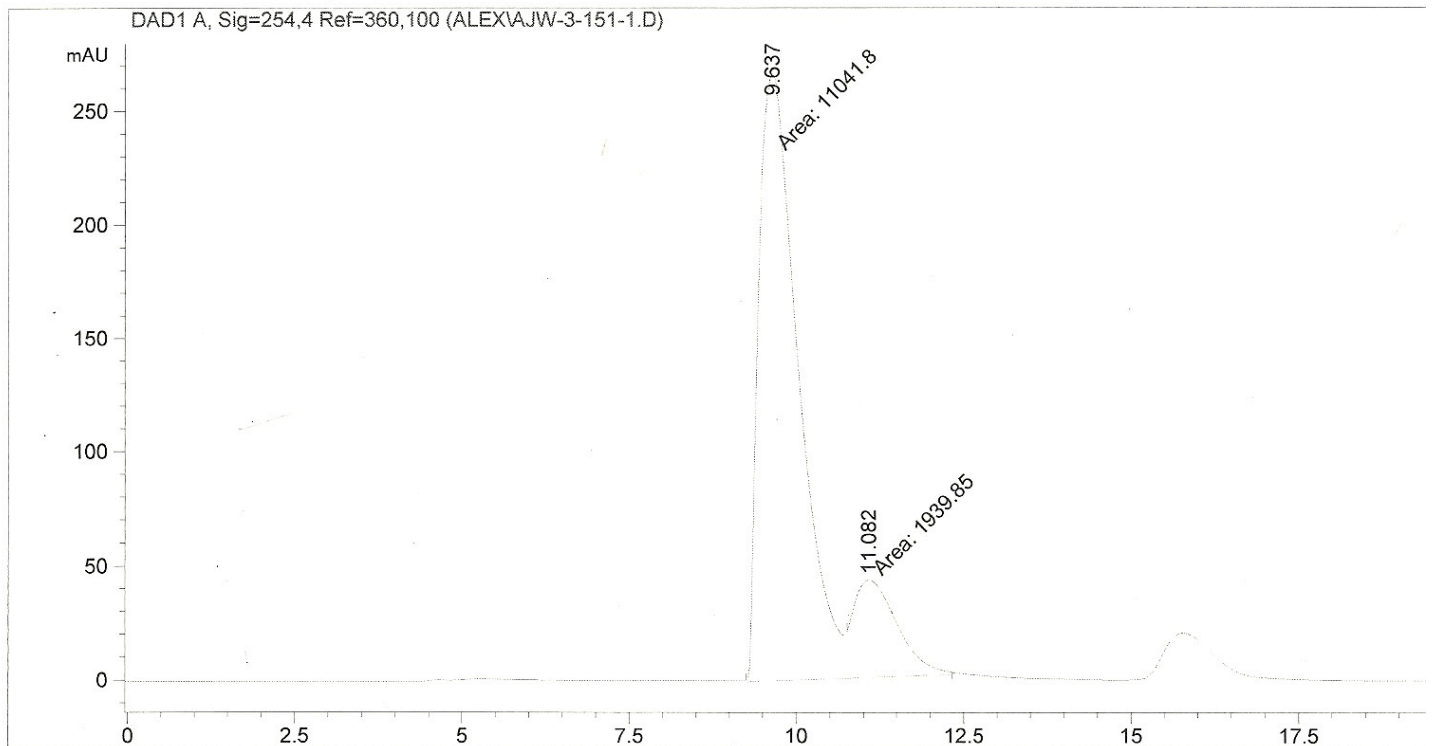

=====  
Area Percent Report  
=====

Sorted By : Signal  
Multiplier: : 1.0000  
Dilution: : 1.0000  
Sample Amount: : 1.00000 [ng/ul] (not used in calc.)  
Use Multiplier & Dilution Factor with ISTDs

Signal 1: DAD1 A, Sig=254,4 Ref=360,100

| Peak # | RetTime [min] | Type | Width [min] | Area [mAU*s] | Height [mAU] | Area %  |
|--------|---------------|------|-------------|--------------|--------------|---------|
| 1      | 9.637         | MF   | 0.6902      | 1.10418e4    | 266.61862    | 85.0570 |
| 2      | 11.082        | FM   | 0.7567      | 1939.85461   | 42.72510     | 14.9430 |

Totals : 1.29817e4 309.34372

=====  
Injection Date : 3/9/2012 2:18:48 PM  
Sample Name : AJW-2-40A4 Location : Vial 3  
Acq. Operator : Alex Inj Volume : 10 µl  
  
Acq. Method : C:\HPCHEM\1\METHODS\ALEX.M  
Last changed : 3/9/2012 12:49:39 PM by Alex  
(modified after loading)  
Analysis Method : C:\HPCHEM\1\METHODS\ALEX.M  
Last changed : 3/9/2012 2:22:25 PM by Alex  
(modified after loading)  
=====

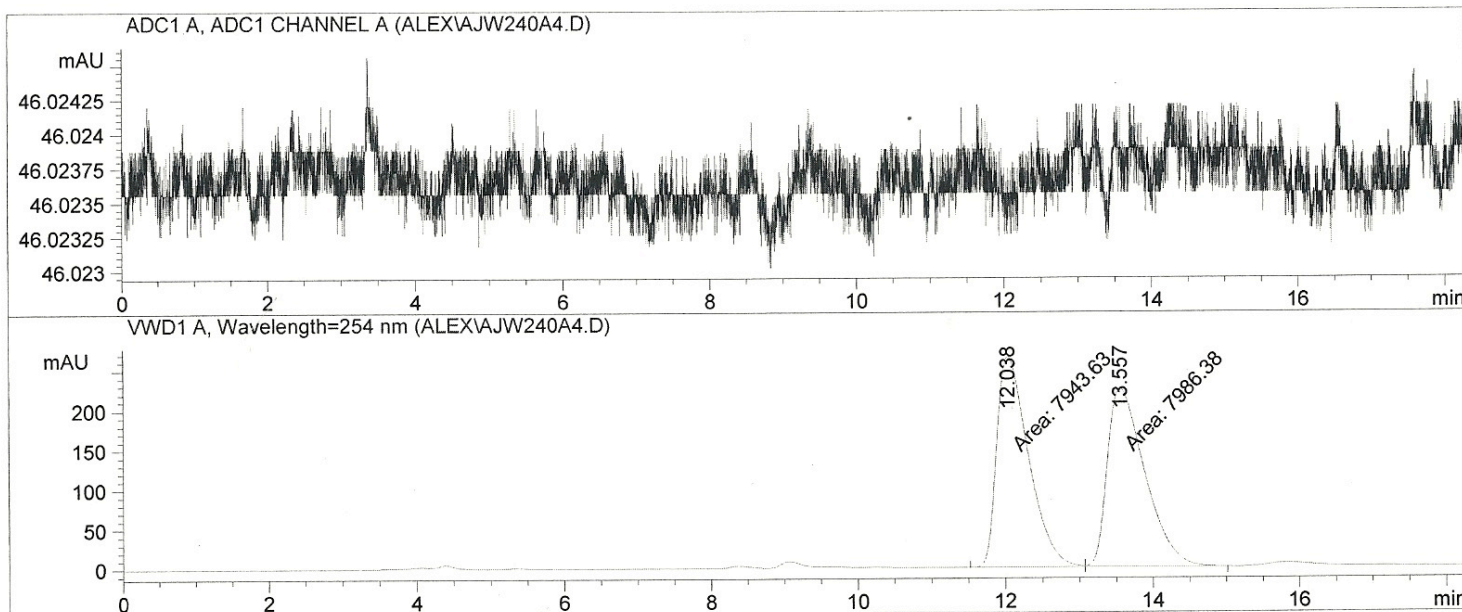

=====  
Area Percent Report  
=====

Sorted By : Signal  
Multiplier : 1.0000  
Dilution : 1.0000  
Sample Amount : 10.00000 [ng/ul] (not used in calc.)  
Use Multiplier & Dilution Factor with ISTDs

Signal 1: ADC1 A, ADC1 CHANNEL A

Signal 2: VWD1 A, Wavelength=254 nm

| Peak # | RetTime [min] | Type | Width [min] | Area mAU *s | Height [mAU] | Area %  |
|--------|---------------|------|-------------|-------------|--------------|---------|
| 1      | 12.038        | MF   | 0.4986      | 7943.62842  | 265.53699    | 49.8658 |
| 2      | 13.557        | FM   | 0.5909      | 7986.37891  | 225.27487    | 50.1342 |

Totals : 1.59300e4 490.81186

Results obtained with enhanced integrator!

=====  
Summed Peaks Report  
=====

Signal 1: ADC1 A, ADC1 CHANNEL A

=====  
Injection Date : 3/9/2012 1:53:06 PM  
Sample Name : AJW-2-176A4 Location : Vial 4  
Acq. Operator : Alex Inj Volume : 10 µl  
  
Acq. Method : C:\HPCHEM\1\METHODS\ALEX.M  
Last changed : 3/9/2012 12:49:39 PM by Alex  
(modified after loading)  
Analysis Method : C:\HPCHEM\1\METHODS\ALEX.M  
Last changed : 12/13/2011 8:09:06 PM by Alex  
=====

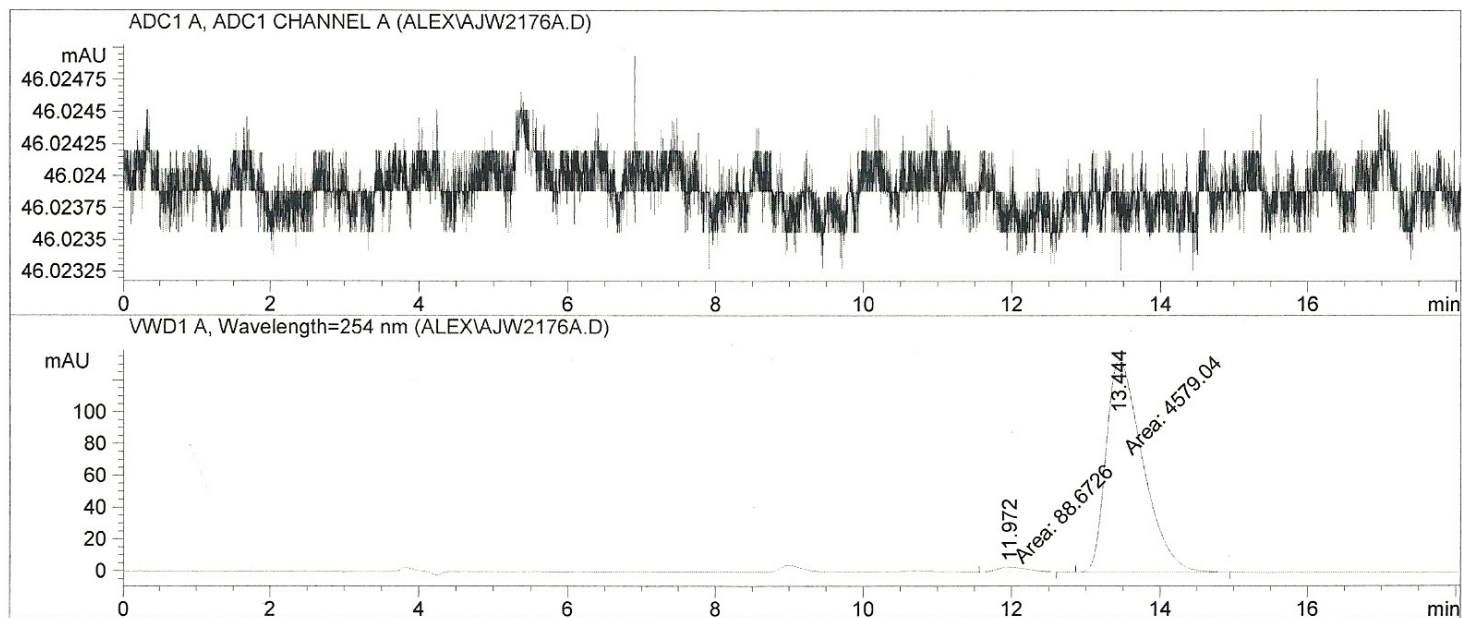

=====  
Area Percent Report  
=====

Sorted By : Signal  
Multiplier : 1.0000  
Dilution : 1.0000  
Sample Amount : 10.00000 [ng/ul] (not used in calc.)  
Use Multiplier & Dilution Factor with ISTDs

Signal 1: ADC1 A, ADC1 CHANNEL A

Signal 2: VWD1 A, Wavelength=254 nm

| Peak # | RetTime [min] | Type | Width [min] | Area mAU *s | Height [mAU] | Area %  |
|--------|---------------|------|-------------|-------------|--------------|---------|
| 1      | 11.972        | MM   | 0.4641      | 88.67263    | 3.18407      | 1.8997  |
| 2      | 13.444        | MM   | 0.5731      | 4579.04443  | 133.17099    | 98.1003 |

Totals : 4667.71706 136.35506

Results obtained with enhanced integrator!

=====  
Summed Peaks Report  
=====

Signal 1: ADC1 A, ADC1 CHANNEL A

Method Name:IMY-6-OMeNapEt-alcohol  
 Run Name:IMY-IV-rac-for-1971

Date:2/25/2013  
 Time:5:07:26 PM

IMY-IV-rac-for-1971.DATA - HP1100 DAD Signal A

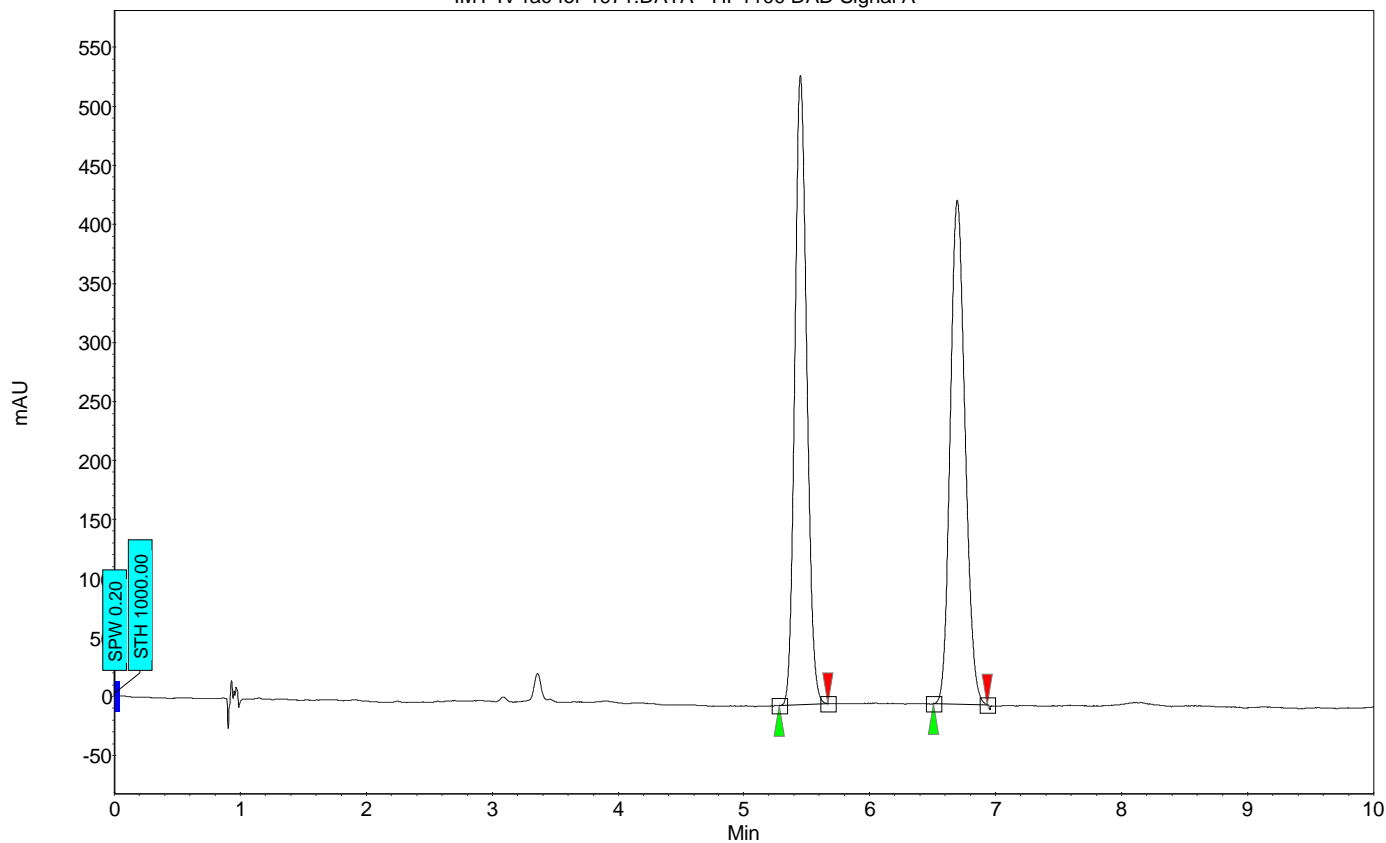

| Index | Name    | Start | Time  | End   | RT Offset | Quantity | Height     | Area           | Area    |
|-------|---------|-------|-------|-------|-----------|----------|------------|----------------|---------|
|       |         | [Min] | [Min] | [Min] | [Min]     | [% Area] | [ $\mu$ V] | [ $\mu$ V.Min] | [%]     |
| 1     | UNKNOWN | 5.28  | 5.45  | 5.67  | 0.00      | 50.08    | 533.2      | 58.7           | 50.078  |
| 2     | UNKNOWN | 6.51  | 6.69  | 6.93  | 0.00      | 49.92    | 427.1      | 58.5           | 49.922  |
| Total |         |       |       |       |           | 100.00   | 960.2      | 117.1          | 100.000 |



Method Name:IMY-6-OMeNapEt-alcohol  
 Run Name:IMY-IV-1976

Date:2/25/2013  
 Time:5:05:59 PM

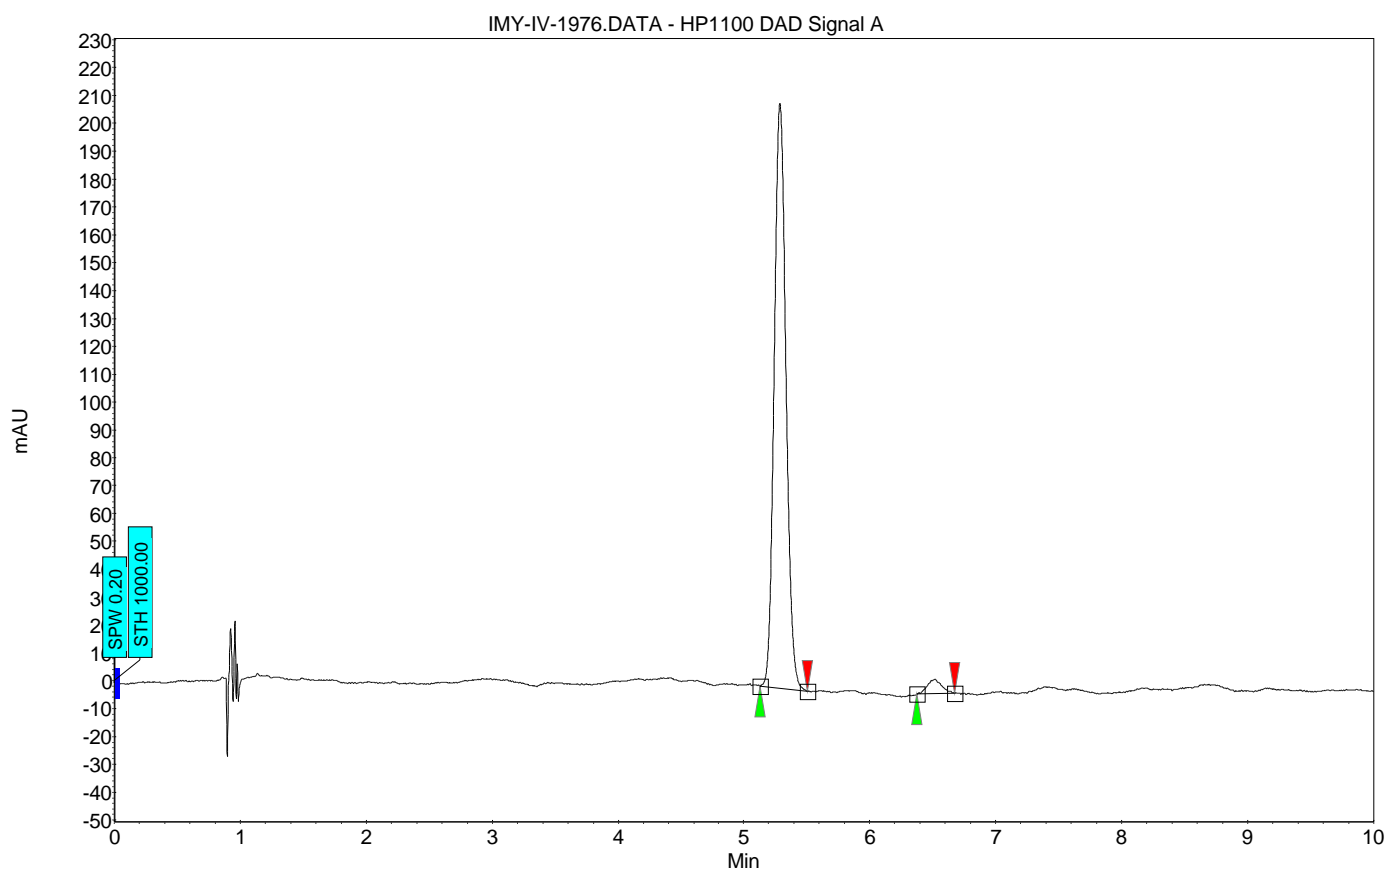

| Index | Name    | Start | Time  | End   | RT Offset | Quantity | Height     | Area           | Area    |
|-------|---------|-------|-------|-------|-----------|----------|------------|----------------|---------|
|       |         | [Min] | [Min] | [Min] | [Min]     | [% Area] | [ $\mu$ V] | [ $\mu$ V.Min] | [%]     |
| 1     | UNKNOWN | 5.13  | 5.29  | 5.51  | 0.00      | 97.12    | 209.9      | 22.7           | 97.119  |
| 2     | UNKNOWN | 6.38  | 6.52  | 6.67  | 0.00      | 2.88     | 5.2        | 0.7            | 2.881   |
| Total |         |       |       |       |           | 100.00   | 215.0      | 23.4           | 100.000 |

Method Name:AGJ-nap-cyclohex\_OH  
 Run Name:IMY-IV-200-RAC1

Date:2/25/2013  
 Time:5:08:40 PM

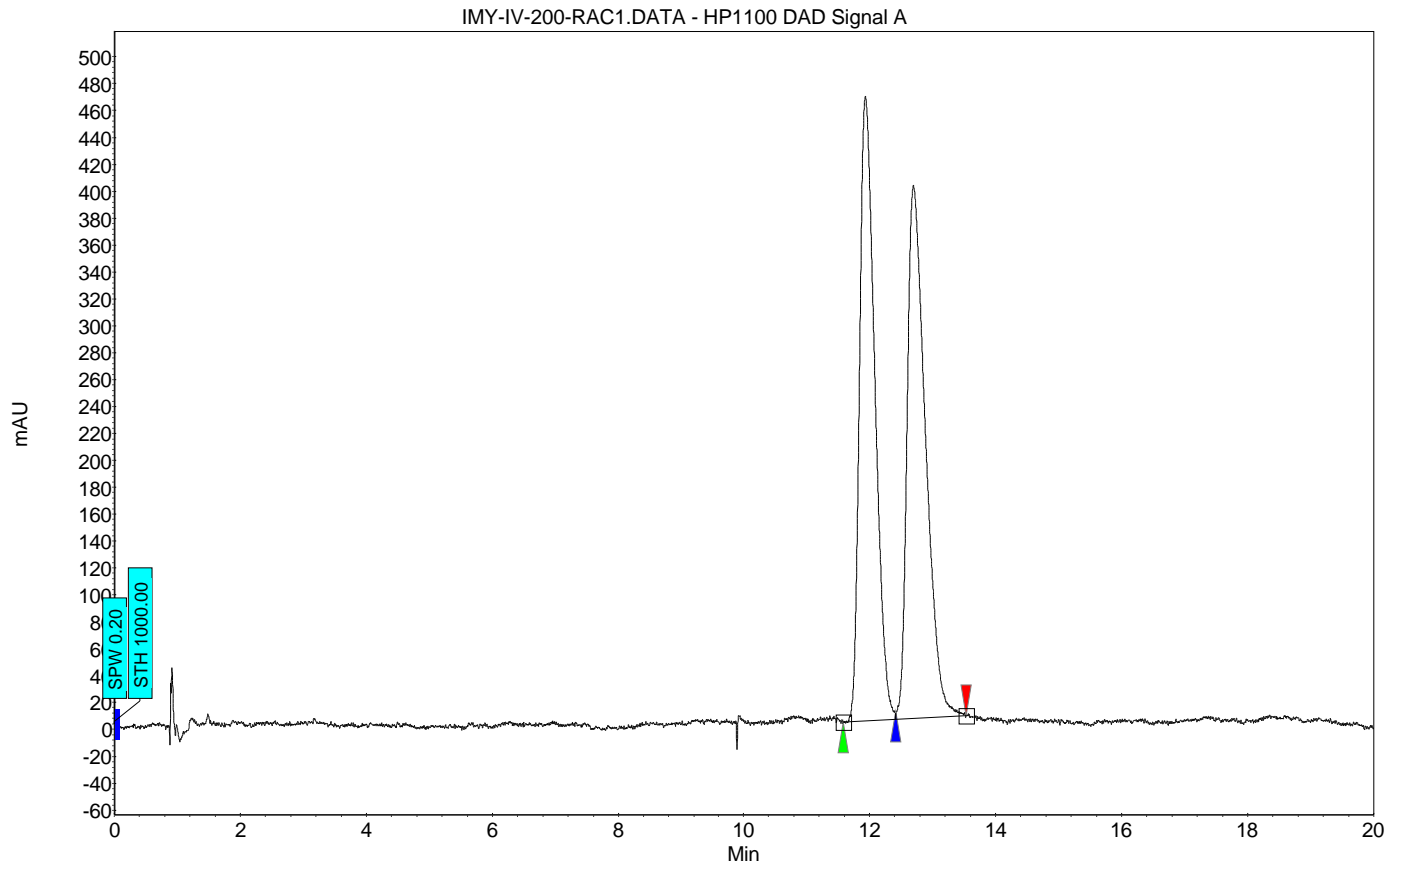

| Index | Name    | Start | Time  | End   | RT Offset | Quantity | Height     | Area           | Area    |
|-------|---------|-------|-------|-------|-----------|----------|------------|----------------|---------|
|       |         | [Min] | [Min] | [Min] | [Min]     | [% Area] | [ $\mu$ V] | [ $\mu$ V.Min] | [%]     |
| 1     | UNKNOWN | 11.58 | 11.93 | 12.41 | 0.00      | 49.52    | 464.2      | 131.0          | 49.517  |
| 2     | UNKNOWN | 12.41 | 12.69 | 13.53 | 0.00      | 50.48    | 396.3      | 133.6          | 50.483  |
| Total |         |       |       |       |           | 100.00   | 860.5      | 264.6          | 100.000 |

Method Name:AGJ-nap-cyclohex\_OH  
 Run Name:IMY-IV-20011

Date:2/25/2013  
 Time:5:08:07 PM

IMY-IV-20011.DATA - HP1100 DAD Signal A

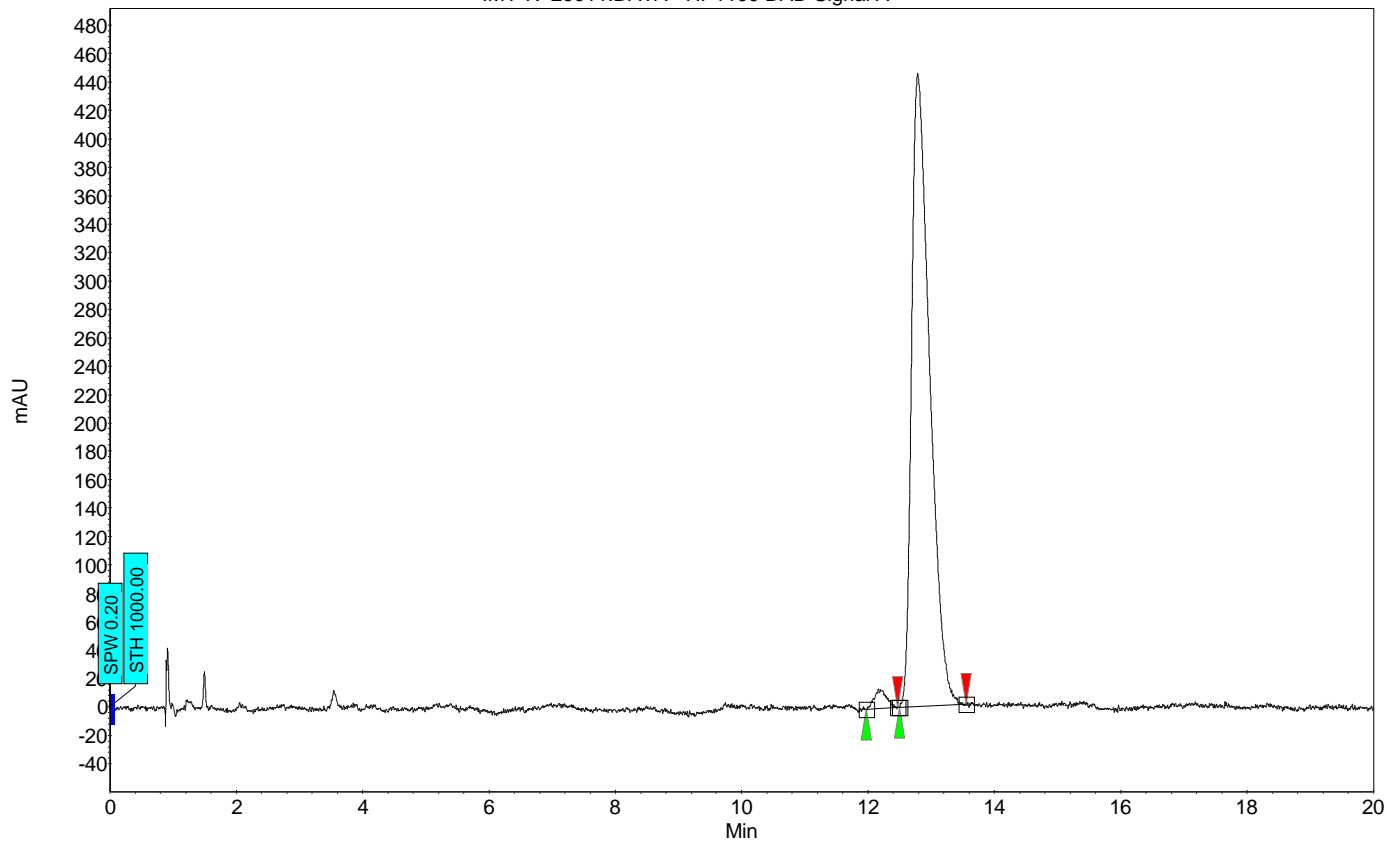

| Index | Name    | Start | Time  | End   | RT Offset | Quantity | Height     | Area           | Area    |
|-------|---------|-------|-------|-------|-----------|----------|------------|----------------|---------|
|       |         | [Min] | [Min] | [Min] | [Min]     | [% Area] | [ $\mu$ V] | [ $\mu$ V.Min] | [%]     |
| 1     | UNKNOWN | 11.98 | 12.17 | 12.47 | 0.00      | 2.01     | 13.9       | 3.0            | 2.010   |
| 2     | UNKNOWN | 12.50 | 12.79 | 13.55 | 0.00      | 97.99    | 445.8      | 147.3          | 97.990  |
| Total |         |       |       |       |           | 100.00   | 459.7      | 150.3          | 100.000 |
